# Supplementary material for: Contaminant Fate and Transport Modeling in Distribution Systems: EPANET-C
Source: MDPI journal article supplement (doi:10.3390/w14101665), 2022-05-23
Supplement: s1 [file s1]

## **SUPPLEMENTARY INFORMATION**

# **Contaminant Fate and Transport Modeling in Distribution Systems: EPANET-C**

**Gopinathan R. Abhijith \* and Avi Ostfeld**

Civil and Environmental Engineering, Technion—Israel Institute of Technology,  
Haifa 32000, Israel; [ostfeld@technion.ac.il](mailto:ostfeld@technion.ac.il)

\* Correspondence: [gnrabhijith@gmail.com](mailto:gnrabhijith@gmail.com)

## ABBREVIATIONS

|         |                                        |
|---------|----------------------------------------|
| BDOC    | Biodegradable dissolved organic carbon |
| MSRT    | Multi-species reactive-transport       |
| PFOA    | Perfluorooctanoic acid                 |
| PFOAAmS | Perfluorooctaneamido ammonium salt     |
| PFOAB   | Perfluorooctaneamido betaine           |
| THMs    | Trihalomethanes                        |
| TOC     | Total organic carbon                   |

## NOMENCLATURE

|           |                                                                                               |
|-----------|-----------------------------------------------------------------------------------------------|
| $K_s$     | Half-saturation constant (mg/L)                                                               |
| $T_i$     | Temperature-dependent shape parameter (°C)                                                    |
| $T$       | Temperature of delivered water (°C)                                                           |
| $X_a$     | Biofilm density as a function of time (CFU/cm <sup>2</sup> )                                  |
| $R_h$     | Hydraulic mean radius (m)                                                                     |
| $T_{opt}$ | Optimal temperature for microbial activity (°C)                                               |
| $X_a$     | Biofilm microbial density as a function of time (CFU/m <sup>2</sup> )                         |
| $X_b$     | Planktonic microbial colony count as a function of time and axial dimension (CFU/mL)          |
| $Y_1$     | Yield coefficient for chlorine corresponding to chlorine-PFOAB reactions (mg/ng)              |
| $Y_2$     | Yield coefficient for chlorine corresponding to chlorine-PFOAAmS reactions (mg/ng)            |
| $Y_h$     | Reaction yield coefficient corresponding to THMs formation from organic matter (µg/mg)        |
| $Y_{f1}$  | Yield-coefficient for PFOA formation from chlorine-PFOAB reactions (ng/ng)                    |
| $Y_{f2}$  | Yield-coefficient for PFOA formation from chlorine-PFOAAmS reactions (ng/ng)                  |
| $Y_n$     | Yield coefficient for TOC/BDOC corresponding to chlorine-TOC/BDOC reactions (mg/mg)           |
| $Y_x$     | Yield coefficient for microbes corresponding to chlorine-microbial biomass reactions (CFU/mg) |

|               |                                                                                                            |
|---------------|------------------------------------------------------------------------------------------------------------|
| $k_1$         | Second-order rate constant corresponding to chlorine-PFOAB reactions (L/mg/h)                              |
| $k_2$         | Second-order rate constant corresponding to chlorine-PFOAAmS reactions (L/mg/h)                            |
| $k_{cn}$      | Second-order rate constant corresponding to chlorine-TOC/BDOC reactions (L/mg/h)                           |
| $k_{cx}$      | Second-order rate constant corresponding to chlorine-microbial biomass reactions (L/mg/h)                  |
| $k_{dep}$     | Microbial deposition rate constant (1/h)                                                                   |
| $k_{det}$     | Microbial detachment rate coefficient (m.h/g)                                                              |
| $k_f$         | Mass-transfer coefficient for chlorine (m/h)                                                               |
| $k_r$         | Resistance factor signifying additional resistance of biofilm microorganisms to chlorine-induced mortality |
| $k_{inact}$   | Microbial growth inactivation constant (L/mg)                                                              |
| $k_{mort}$    | Microbial mortality rate constant (1/h)                                                                    |
| $k_w$         | Wall decay coefficient for chlorine (m/h)                                                                  |
| $\mu_{max,a}$ | Maximum specific growth rate of biofilm microbes (1/h)                                                     |
| $\mu_{max,b}$ | Maximum specific growth rate of planktonic microbes (1/h)                                                  |
| $\tau_w$      | Shear stress caused by pipe flow velocity at wall (g/m.h <sup>2</sup> )                                    |
| $C$           | Concentration of residual chlorine as a function of time and axial dimension (mg/L)                        |
| $H$           | Concentration of THMs as a function of time and axial dimension (µg/L)                                     |
| $N$           | Concentration of TOC as a function of time and axial dimension (mg/L)                                      |
| $S$           | Concentration of BDOC as a function of time and axial dimension (mg/L)                                     |
| $F_1$         | Concentration of PFOAB as a function of time and axial dimension (ng/L)                                    |
| $F_2$         | Concentration of PFOAAmS as a function of time and axial dimension (ng/L)                                  |
| $Y$           | Microbial growth yield coefficient (CFU/mg)                                                                |
| $a$           | Dead microbial fraction getting converted as BDOC after cell lysis (mg/CFU)                                |

|           |                                                                               |
|-----------|-------------------------------------------------------------------------------|
| $t$       | Time (h)                                                                      |
| $u$       | Flow velocity (m/h)                                                           |
| $x$       | Distance along the axial direction (m)                                        |
| 2,4,6-TCA | 2,4,6-trichloroanisole                                                        |
| 2,4,6-TCP | 2,4,6-trichlorophenol                                                         |
| $E_{K_d}$ | Temperature coefficient corresponding to 2,4,6-TCP degradation                |
| $E_{Y_f}$ | Temperature coefficient corresponding to 2,4,6-TCA formation                  |
| $Y_{pf}$  | Pipe material dependent constant concerning 2,4,6-TCP bioconversion (ng/mg)   |
| $a_2$     | Reaction yield coefficient concerning 2,4,6-TCP bioconversion (L/CFU)         |
| $T_p$     | Concentration of 2,4,6-TCP as a function of time and axial dimension (mg/L)   |
| $a_1$     | 2,4,6-TCP degradation constant (1/h)                                          |
| $A$       | Concentration of 2,4,6-TCA as a function of time and axial dimension (ng/L)   |
| $b$       | Microbial activation rate constant concerning 2,4,6-TCP bioconversion (L/CFU) |

## S1. Governing Equations of EPANET-C MSRT Modules

Module ‘1’

$$\frac{\partial C}{\partial t} + u \frac{\partial C}{\partial x} = -k_{cn} \times N \times C - k_{cx} \times X_b \times C - \frac{k_w \times k_f}{(k_w + k_f) \times R_h} \times C \quad (S1)$$

$$\begin{aligned} \frac{\partial N}{\partial t} + u \frac{\partial N}{\partial x} = & -\frac{1}{Y} \times \mu_{max,b} \frac{S}{K_s + S} \times \exp(-k_{inact} \times C) \times \exp\left[\left(-\frac{(T_{opt}-T)}{(T_{opt}-T_i)}\right)^2\right] \times X_b - Y_n \times \\ & k_{cn} \times N \times C + a(Y_x \times k_{cx} \times X_b \times C + k_{mort} \times X_b) \end{aligned} \quad (S2)$$

$$\begin{aligned} \frac{\partial S}{\partial t} + u \frac{\partial S}{\partial x} = & -\frac{1}{Y} \times \mu_{max,b} \frac{S}{K_s + S} \times \exp(-k_{inact} \times C) \times \exp\left[\left(-\frac{(T_{opt}-T)}{(T_{opt}-T_i)}\right)^2\right] \times X_b - Y_n \times \\ & k_{cn} \times S \times C + a(Y_x \times k_{cx} \times X_b \times C + k_{mort} \times X_b) \end{aligned} \quad (S3)$$

$$\begin{aligned} \frac{\partial X_b}{\partial t} + u \frac{\partial X_b}{\partial x} = & \mu_{max,b} \frac{S}{K_s + S} \times \exp(-k_{inact} \times C) \times \exp\left[\left(-\frac{(T_{opt}-T)}{(T_{opt}-T_i)}\right)^2\right] \times X_b - Y_x \times k_{cx} \times \\ & X_b \times C - k_{mort} \times X_b - k_{dep} \times X_b + k_{det} \times \tau_w \times \frac{X_a}{R_h} \end{aligned} \quad (S4)$$

$$\begin{aligned} \frac{dX_a}{dt} = & \mu_{max,a} \times \exp\left(-\frac{k_{inact}}{k_r} \times C\right) \times \exp\left[\left(-\frac{(T_{opt}-T)}{(T_{opt}-T_i)}\right)^2\right] \times X_a - k_{mort} \times X_a + k_{dep} \times X_b \times \\ & R_h - k_{det} \times \tau_w \times X_a \end{aligned} \quad (S5)$$

Module ‘2’

$$\frac{\partial C}{\partial t} + u \frac{\partial C}{\partial x} = -k_{cn} \times N \times C - \frac{k_w \times k_f}{(k_w + k_f) \times R_h} \times C \quad (S6)$$

$$\frac{\partial N}{\partial t} + u \frac{\partial N}{\partial x} = -Y_n \times k_{cn} \times N \times C \quad (S7)$$

$$\frac{\partial H}{\partial t} + u \frac{\partial H}{\partial x} = Y_h \times k_{cn} \times N \times C \quad (S8)$$

Module ‘3’

$$\frac{\partial C}{\partial t} + u \frac{\partial C}{\partial x} = -k_{cn} \times N \times C - k_{cx} \times X_b \times C - \frac{k_w \times k_f}{(k_w + k_f) \times R_h} \times C \quad (S9)$$

$$\frac{\partial N}{\partial t} + u \frac{\partial N}{\partial x} = -\frac{1}{Y} \times \mu_{max,b} \frac{S}{K_S + S} \times \exp(-k_{inact} \times C) \times \exp\left[\left(-\frac{(T_{opt}-T)}{(T_{opt}-T_i)}\right)^2\right] \times X_b - Y_n \times k_{cn} \times N \times C + a(Y_x \times k_{cx} \times X_b \times C + k_{mort} \times X_b) \quad (S10)$$

$$\frac{\partial S}{\partial t} + u \frac{\partial S}{\partial x} = -\frac{1}{Y} \times \mu_{max,b} \frac{S}{K_S + S} \times \exp(-k_{inact} \times C) \times \exp\left[\left(-\frac{(T_{opt}-T)}{(T_{opt}-T_i)}\right)^2\right] \times X_b - Y_n \times k_{cn} \times S \times C + a(Y_x \times k_{cx} \times X_b \times C + k_{mort} \times X_b) \quad (S11)$$

$$\frac{\partial X_b}{\partial t} + u \frac{\partial X_b}{\partial x} = \mu_{max,b} \frac{S}{K_S + S} \times \exp(-k_{inact} \times C) \times \exp\left[\left(-\frac{(T_{opt}-T)}{(T_{opt}-T_i)}\right)^2\right] \times X_b - Y_x \times k_{cx} \times X_b \times C - k_{mort} \times X_b \quad (S12)$$

Module ‘4’

$$\frac{\partial C}{\partial t} + u \frac{\partial C}{\partial x} = -k_{cn} \times N \times C - Y_1 \times k_1 \times C \times F_1 - Y_2 \times k_2 \times C \times F_2 - \frac{k_w \times k_f}{(k_w + k_f) \times R_h} \times C \quad (S13)$$

$$\frac{\partial N}{\partial t} + u \frac{\partial N}{\partial x} = -Y_n \times k_{cn} \times N \times C \quad (S14)$$

$$\frac{\partial F_1}{\partial t} + u \frac{\partial F_1}{\partial x} = -k_1 \times C \times F_1 \quad (S15)$$

$$\frac{\partial F_2}{\partial t} + u \frac{\partial F_2}{\partial x} = -k_2 \times C \times F_2 \quad (S16)$$

$$\frac{\partial P}{\partial t} + u \frac{\partial P}{\partial x} = Y_{f1} \times k_1 \times C \times F_1 + Y_{f2} \times k_2 \times C \times F_2 \quad (S17)$$

Module ‘12’

$$\frac{\partial C}{\partial t} + u \frac{\partial C}{\partial x} = -k_{cn} \times N \times C - k_{cx} \times X_b \times C - \frac{k_w \times k_f}{(k_w + k_f) \times R_h} \times C \quad (S18)$$

$$\frac{\partial N}{\partial t} + u \frac{\partial N}{\partial x} = -\frac{1}{Y} \times \mu_{max,b} \frac{S}{K_S + S} \times \exp(-k_{inact} \times C) \times \exp\left[\left(-\frac{(T_{opt}-T)}{(T_{opt}-T_i)}\right)^2\right] \times X_b - Y_n \times k_{cn} \times N \times C + a(Y_x \times k_{cx} \times X_b \times C + k_{mort} \times X_b) \quad (S19)$$

$$\frac{\partial S}{\partial t} + u \frac{\partial S}{\partial x} = -\frac{1}{Y} \times \mu_{max,b} \frac{S}{K_S + S} \times \exp(-k_{inact} \times C) \times \exp\left[\left(-\frac{(T_{opt}-T)}{(T_{opt}-T_i)}\right)^2\right] \times X_b - Y_n \times k_{cn} \times S \times C + a(Y_x \times k_{cx} \times X_b \times C + k_{mort} \times X_b) \quad (S20)$$

$$\frac{\partial X_b}{\partial t} + u \frac{\partial X_b}{\partial x} = \mu_{max,b} \frac{S}{K_s + S} \times \exp(-k_{inact} \times C) \times \exp\left[\left(-\frac{(T_{opt}-T)}{(T_{opt}-T_i)}\right)^2\right] \times X_b - Y_x \times k_{cx} \times X_b \times C - k_{mort} \times X_b - k_{dep} \times X_b + k_{det} \times \tau_w \times \frac{X_a}{R_h} \quad (S21)$$

$$\frac{dX_a}{dt} = \mu_{max,a} \times \exp\left(-\frac{k_{inact}}{k_r} \times C\right) \times \exp\left[\left(-\frac{(T_{opt}-T)}{(T_{opt}-T_i)}\right)^2\right] \times X_a - k_{mort} \times X_a + k_{dep} \times X_b \times R_h - k_{det} \times \tau_w \times X_a \quad (S22)$$

$$\frac{\partial H}{\partial t} + u \frac{\partial H}{\partial x} = Y_h \times k_{cn} \times N \times C \quad (S23)$$

Module ‘13’

$$\frac{\partial C}{\partial t} + u \frac{\partial C}{\partial x} = -k_{cn} \times N \times C - k_{cx} \times X_b \times C - \frac{k_w \times k_f}{(k_w + k_f) \times R_h} \times C \quad (S24)$$

$$\frac{\partial N}{\partial t} + u \frac{\partial N}{\partial x} = -\frac{1}{Y} \times \mu_{max,b} \frac{S}{K_s + S} \times \exp(-k_{inact} \times C) \times \exp\left[\left(-\frac{(T_{opt}-T)}{(T_{opt}-T_i)}\right)^2\right] \times X_b - Y_n \times k_{cn} \times N \times C + a(Y_x \times k_{cx} \times X_b \times C + k_{mort} \times X_b) \quad (S25)$$

$$\frac{\partial S}{\partial t} + u \frac{\partial S}{\partial x} = -\frac{1}{Y} \times \mu_{max,b} \frac{S}{K_s + S} \times \exp(-k_{inact} \times C) \times \exp\left[\left(-\frac{(T_{opt}-T)}{(T_{opt}-T_i)}\right)^2\right] \times X_b - Y_n \times k_{cn} \times S \times C + a(Y_x \times k_{cx} \times X_b \times C + k_{mort} \times X_b) \quad (S26)$$

$$\frac{\partial X_b}{\partial t} + u \frac{\partial X_b}{\partial x} = \mu_{max,b} \frac{S}{K_s + S} \times \exp(-k_{inact} \times C) \times \exp\left[\left(-\frac{(T_{opt}-T)}{(T_{opt}-T_i)}\right)^2\right] \times X_b - Y_x \times k_{cx} \times X_b \times C - k_{mort} \times X_b - k_{dep} \times X_b + k_{det} \times \tau_w \times \frac{X_a}{R_h} \quad (S27)$$

$$\frac{dX_a}{dt} = \mu_{max,a} \times \exp\left(-\frac{k_{inact}}{k_r} \times C\right) \times \exp\left[\left(-\frac{(T_{opt}-T)}{(T_{opt}-T_i)}\right)^2\right] \times X_a - k_{mort} \times X_a + k_{dep} \times X_b \times R_h - k_{det} \times \tau_w \times X_a \quad (S28)$$

$$\frac{\partial T_P}{\partial t} + u \frac{\partial T_P}{\partial x} = -a_1 \times \log_e(b \times X_b) \times \exp\left[E_{K_d} \times \left(1 - \frac{293}{T+273}\right)\right] \times T_P \quad (S29)$$

$$\frac{\partial A}{\partial t} + u \frac{\partial A}{\partial x} = (a_2 \times X_b + Y_{pf}) \times \exp\left[E_{Y_f} \times \left(1 - \frac{293}{T+273}\right)\right] \times a_1 \times \log_e(b \times X_b) \times \exp\left[E_{K_d} \times \left(1 - \frac{293}{T+273}\right)\right] \times T_P \quad (S30)$$

Module ‘14’

$$\frac{\partial C}{\partial t} + u \frac{\partial C}{\partial x} = -k_{cn} \times N \times C - Y_1 \times k_1 \times C \times F_1 - Y_2 \times k_2 \times C \times F_2 - k_{cx} \times X_b \times C - \frac{k_w \times k_f}{(k_w + k_f) \times R_h} \times C \quad (S31)$$

$$\frac{\partial N}{\partial t} + u \frac{\partial N}{\partial x} = -\frac{1}{Y} \times \mu_{max,b} \frac{S}{K_s + S} \times \exp(-k_{inact} \times C) \times \exp\left[\left(-\frac{(T_{opt}-T)}{(T_{opt}-T_i)}\right)^2\right] \times X_b - Y_n \times k_{cn} \times N \times C + a(Y_x \times k_{cx} \times X_b \times C + k_{mort} \times X_b) \quad (S32)$$

$$\frac{\partial S}{\partial t} + u \frac{\partial S}{\partial x} = -\frac{1}{Y} \times \mu_{max,b} \frac{S}{K_s + S} \times \exp(-k_{inact} \times C) \times \exp\left[\left(-\frac{(T_{opt}-T)}{(T_{opt}-T_i)}\right)^2\right] \times X_b - Y_n \times k_{cn} \times S \times C + a(Y_x \times k_{cx} \times X_b \times C + k_{mort} \times X_b) \quad (S33)$$

$$\frac{\partial X_b}{\partial t} + u \frac{\partial X_b}{\partial x} = \mu_{max,b} \frac{S}{K_s + S} \times \exp(-k_{inact} \times C) \times \exp\left[\left(-\frac{(T_{opt}-T)}{(T_{opt}-T_i)}\right)^2\right] \times X_b - Y_x \times k_{cx} \times X_b \times C - k_{mort} \times X_b - k_{dep} \times X_b + k_{det} \times \tau_w \times \frac{X_a}{R_h} \quad (S34)$$

$$\frac{dX_a}{dt} = \mu_{max,a} \times \exp\left(-\frac{k_{inact}}{k_r} \times C\right) \times \exp\left[\left(-\frac{(T_{opt}-T)}{(T_{opt}-T_i)}\right)^2\right] \times X_a - k_{mort} \times X_a + k_{dep} \times X_b \times$$

$$R_h - k_{det} \times \tau_w \times X_a \quad (S35)$$

$$\frac{\partial F_1}{\partial t} + u \frac{\partial F_1}{\partial x} = -k_1 \times C \times F_1 \quad (S36)$$

$$\frac{\partial F_2}{\partial t} + u \frac{\partial F_2}{\partial x} = -k_2 \times C \times F_2 \quad (S37)$$

$$\frac{\partial P}{\partial t} + u \frac{\partial P}{\partial x} = Y_{f1} \times k_1 \times C \times F_1 + Y_{f2} \times k_2 \times C \times F_2 \quad (S38)$$

Module ‘23’

$$\frac{\partial C}{\partial t} + u \frac{\partial C}{\partial x} = -k_{cn} \times N \times C - k_{cx} \times X_b \times C - \frac{k_w \times k_f}{(k_w + k_f) \times R_h} \times C \quad (S39)$$

$$\frac{\partial N}{\partial t} + u \frac{\partial N}{\partial x} = -\frac{1}{Y} \times \mu_{max,b} \frac{S}{K_s + S} \times \exp(-k_{inact} \times C) \times \exp\left[\left(-\frac{(T_{opt}-T)}{(T_{opt}-T_i)}\right)^2\right] \times X_b - Y_n \times k_{cn} \times N \times C + a(Y_x \times k_{cx} \times X_b \times C + k_{mort} \times X_b) \quad (S40)$$



$$\frac{\partial S}{\partial t} + u \frac{\partial S}{\partial x} = -\frac{1}{Y} \times \mu_{max,b} \frac{S}{K_S + S} \times \exp(-k_{inact} \times C) \times \exp\left[\left(-\frac{(T_{opt}-T)}{(T_{opt}-T_i)}\right)^2\right] \times X_b - Y_n \times k_{cn} \times S \times C + a(Y_x \times k_{cx} \times X_b \times C + k_{mort} \times X_b) \quad (S41)$$

$$\frac{\partial X_b}{\partial t} + u \frac{\partial X_b}{\partial x} = \mu_{max,b} \frac{S}{K_S + S} \times \exp(-k_{inact} \times C) \times \exp\left[\left(-\frac{(T_{opt}-T)}{(T_{opt}-T_i)}\right)^2\right] \times X_b - Y_x \times k_{cx} \times X_b \times C - k_{mort} \times X_b \quad (S42)$$

$$\frac{\partial H}{\partial t} + u \frac{\partial H}{\partial x} = Y_h \times k_{cn} \times N \times C \quad (S43)$$

Module ‘24’

$$\frac{\partial C}{\partial t} + u \frac{\partial C}{\partial x} = -k_{cn} \times N \times C - Y_1 \times k_1 \times C \times F_1 - Y_2 \times k_2 \times C \times F_2 - k_{cx} \times X_b \times C - \frac{k_w \times k_f}{(k_w + k_f) \times R_h} \times C \quad (S44)$$

$$\frac{\partial N}{\partial t} + u \frac{\partial N}{\partial x} = -Y_n \times k_{cn} \times N \times C \quad (S45)$$

$$\frac{\partial H}{\partial t} + u \frac{\partial H}{\partial x} = Y_h \times k_{cn} \times N \times C \quad (S46)$$

$$\frac{\partial F_1}{\partial t} + u \frac{\partial F_1}{\partial x} = -k_1 \times C \times F_1 \quad (S47)$$

$$\frac{\partial F_2}{\partial t} + u \frac{\partial F_2}{\partial x} = -k_2 \times C \times F_2 \quad (S48)$$

$$\frac{\partial P}{\partial t} + u \frac{\partial P}{\partial x} = Y_{f1} \times k_1 \times C \times F_1 + Y_{f2} \times k_2 \times C \times F_2 \quad (S49)$$

Module ‘34’

$$\frac{\partial C}{\partial t} + u \frac{\partial C}{\partial x} = -k_{cn} \times N \times C - Y_1 \times k_1 \times C \times F_1 - Y_2 \times k_2 \times C \times F_2 - k_{cx} \times X_b \times C - \frac{k_w \times k_f}{(k_w + k_f) \times R_h} \times C \quad (S50)$$

$$\frac{\partial N}{\partial t} + u \frac{\partial N}{\partial x} = -\frac{1}{Y} \times \mu_{max,b} \frac{S}{K_S + S} \times \exp(-k_{inact} \times C) \times \exp\left[\left(-\frac{(T_{opt}-T)}{(T_{opt}-T_i)}\right)^2\right] \times X_b - Y_n \times k_{cn} \times N \times C + a(Y_x \times k_{cx} \times X_b \times C + k_{mort} \times X_b) \quad (S51)$$

$$\frac{\partial S}{\partial t} + u \frac{\partial S}{\partial x} = -\frac{1}{Y} \times \mu_{max,b} \frac{S}{K_S + S} \times \exp(-k_{inact} \times C) \times \exp\left[\left(-\frac{(T_{opt}-T)}{(T_{opt}-T_i)}\right)^2\right] \times X_b - Y_n \times k_{cn} \times S \times C + a(Y_x \times k_{cx} \times X_b \times C + k_{mort} \times X_b) \quad (S52)$$

$$\begin{aligned} \frac{\partial X_b}{\partial t} + u \frac{\partial X_b}{\partial x} &= \mu_{max,b} \frac{S}{K_s + S} \times \exp(-k_{inact} \times C) \times \exp\left[\left(-\frac{(T_{opt}-T)}{(T_{opt}-T_i)}\right)^2\right] \times X_b - \\ Y_x \times k_{cx} \times X_b \times C - k_{mort} \times X_b \end{aligned} \quad (S53)$$

$$\frac{\partial T_P}{\partial t} + u \frac{\partial T_P}{\partial x} = -a_1 \times \log_e(b \times X_b) \times \exp\left[E_{K_d} \times \left(1 - \frac{293}{T+273}\right)\right] \times T_P \quad (S54)$$

$$\begin{aligned} \frac{\partial A}{\partial t} + u \frac{\partial A}{\partial x} &= (a_2 \times X_b + Y_{pf}) \times \exp\left[E_{Y_f} \times \left(1 - \frac{293}{T+273}\right)\right] \times a_1 \times \log_e(b \times X_b) \times \exp\left[E_{K_d} \times \right. \\ &\left. \left(1 - \frac{293}{T+273}\right)\right] \times T_P \end{aligned} \quad (S55)$$

$$\frac{\partial F_1}{\partial t} + u \frac{\partial F_1}{\partial x} = -k_1 \times C \times F_1 \quad (S56)$$

$$\frac{\partial F_2}{\partial t} + u \frac{\partial F_2}{\partial x} = -k_2 \times C \times F_2 \quad (S57)$$

$$\frac{\partial P}{\partial t} + u \frac{\partial P}{\partial x} = Y_{f1} \times k_1 \times C \times F_1 + Y_{f2} \times k_2 \times C \times F_2 \quad (S58)$$

Module ‘123’

$$\frac{\partial C}{\partial t} + u \frac{\partial C}{\partial x} = -k_{cn} \times N \times C - k_{cx} \times X_b \times C - \frac{k_w \times k_f}{(k_w + k_f) \times R_h} \times C \quad (S59)$$

$$\begin{aligned} \frac{\partial N}{\partial t} + u \frac{\partial N}{\partial x} &= -\frac{1}{Y} \times \mu_{max,b} \frac{S}{K_s + S} \times \exp(-k_{inact} \times C) \times \exp\left[\left(-\frac{(T_{opt}-T)}{(T_{opt}-T_i)}\right)^2\right] \times X_b - Y_n \times \\ k_{cn} \times N \times C + a(Y_x \times k_{cx} \times X_b \times C + k_{mort} \times X_b) \end{aligned} \quad (S60)$$

$$\begin{aligned} \frac{\partial S}{\partial t} + u \frac{\partial S}{\partial x} &= -\frac{1}{Y} \times \mu_{max,b} \frac{S}{K_s + S} \times \exp(-k_{inact} \times C) \times \exp\left[\left(-\frac{(T_{opt}-T)}{(T_{opt}-T_i)}\right)^2\right] \times X_b - Y_n \times \\ k_{cn} \times S \times C + a(Y_x \times k_{cx} \times X_b \times C + k_{mort} \times X_b) \end{aligned} \quad (S61)$$

$$\begin{aligned} \frac{\partial X_b}{\partial t} + u \frac{\partial X_b}{\partial x} &= \mu_{max,b} \frac{S}{K_s + S} \times \exp(-k_{inact} \times C) \times \exp\left[\left(-\frac{(T_{opt}-T)}{(T_{opt}-T_i)}\right)^2\right] \times X_b - Y_x \times k_{cx} \times \\ X_b \times C - k_{mort} \times X_b - k_{dep} \times X_b + k_{det} \times \tau_w \times \frac{X_a}{R_h} \end{aligned} \quad (S62)$$

$$\frac{dX_a}{dt} = \mu_{max,a} \times \exp\left(-\frac{k_{inact}}{k_r} \times C\right) \times \exp\left[\left(-\frac{(T_{opt}-T)}{(T_{opt}-T_i)}\right)^2\right] \times X_a - k_{mort} \times X_a + k_{dep} \times X_b \times$$

$$R_h - k_{det} \times \tau_w \times X_a \quad (S63)$$

$$\frac{\partial H}{\partial t} + u \frac{\partial H}{\partial x} = Y_h \times k_{cn} \times N \times C \quad (S64)$$

$$\frac{\partial T_P}{\partial t} + u \frac{\partial T_P}{\partial x} = -a_1 \times \log_e(b \times X_b) \times \exp \left[ E_{K_d} \times \left( 1 - \frac{293}{T+273} \right) \right] \times T_P \quad (S65)$$

$$\frac{\partial A}{\partial t} + u \frac{\partial A}{\partial x} = (a_2 \times X_b + Y_{pf}) \times \exp \left[ E_{Y_f} \times \left( 1 - \frac{293}{T+273} \right) \right] \times a_1 \times \log_e(b \times X_b) \times \exp \left[ E_{K_d} \times \left( 1 - \frac{293}{T+273} \right) \right] \times T_P \quad (S66)$$

Module ‘124’

$$\frac{\partial C}{\partial t} + u \frac{\partial C}{\partial x} = -k_{cn} \times N \times C - Y_1 \times k_1 \times C \times F_1 - Y_2 \times k_2 \times C \times F_2 - k_{cx} \times X_b \times C - \frac{k_w \times k_f}{(k_w + k_f) \times R_h} \times C \quad (S67)$$

$$\frac{\partial N}{\partial t} + u \frac{\partial N}{\partial x} = -\frac{1}{Y} \times \mu_{max,b} \frac{S}{K_s + S} \times \exp(-k_{inact} \times C) \times \exp \left[ \left( -\frac{(T_{opt}-T)}{(T_{opt}-T_i)} \right)^2 \right] \times X_b - Y_n \times k_{cn} \times N \times C + a(Y_x \times k_{cx} \times X_b \times C + k_{mort} \times X_b) \quad (S68)$$

$$\frac{\partial S}{\partial t} + u \frac{\partial S}{\partial x} = -\frac{1}{Y} \times \mu_{max,b} \frac{S}{K_s + S} \times \exp(-k_{inact} \times C) \times \exp \left[ \left( -\frac{(T_{opt}-T)}{(T_{opt}-T_i)} \right)^2 \right] \times X_b - Y_n \times k_{cn} \times S \times C + a(Y_x \times k_{cx} \times X_b \times C + k_{mort} \times X_b) \quad (S69)$$

$$\frac{\partial X_b}{\partial t} + u \frac{\partial X_b}{\partial x} = \mu_{max,b} \frac{S}{K_s + S} \times \exp(-k_{inact} \times C) \times \exp \left[ \left( -\frac{(T_{opt}-T)}{(T_{opt}-T_i)} \right)^2 \right] \times X_b - Y_x \times k_{cx} \times X_b \times C - k_{mort} \times X_b - k_{dep} \times X_b + k_{det} \times \tau_w \times \frac{X_a}{R_h} \quad (S70)$$

$$\frac{dX_a}{dt} = \mu_{max,a} \times \exp \left( -\frac{k_{inact}}{k_r} \times C \right) \times \exp \left[ \left( -\frac{(T_{opt}-T)}{(T_{opt}-T_i)} \right)^2 \right] \times X_a - k_{mort} \times X_a + k_{dep} \times X_b \times$$

$$R_h - k_{det} \times \tau_w \times X_a \quad (S71)$$

$$\frac{\partial H}{\partial t} + u \frac{\partial H}{\partial x} = Y_h \times k_{cn} \times N \times C \quad (S72)$$

$$\frac{\partial F_1}{\partial t} + u \frac{\partial F_1}{\partial x} = -k_1 \times C \times F_1 \quad (S73)$$

$$\frac{\partial F_2}{\partial t} + u \frac{\partial F_2}{\partial x} = -k_2 \times C \times F_2 \quad (S74)$$

$$\frac{\partial P}{\partial t} + u \frac{\partial P}{\partial x} = Y_{f1} \times k_1 \times C \times F_1 + Y_{f2} \times k_2 \times C \times F_2 \quad (S75)$$

Module ‘134’

$$\frac{\partial C}{\partial t} + u \frac{\partial C}{\partial x} = -k_{cn} \times N \times C - Y_1 \times k_1 \times C \times F_1 - Y_2 \times k_2 \times C \times F_2 - k_{cx} \times X_b \times C - \frac{k_w \times k_f}{(k_w + k_f) \times R_h} \times C \quad (S76)$$

$$\frac{\partial N}{\partial t} + u \frac{\partial N}{\partial x} = -\frac{1}{Y} \times \mu_{max,b} \frac{S}{K_s + S} \times \exp(-k_{inact} \times C) \times \exp\left[\left(-\frac{(T_{opt}-T)}{(T_{opt}-T_i)}\right)^2\right] \times X_b - Y_n \times k_{cn} \times N \times C + a(Y_x \times k_{cx} \times X_b \times C + k_{mort} \times X_b) \quad (S77)$$

$$\frac{\partial S}{\partial t} + u \frac{\partial S}{\partial x} = -\frac{1}{Y} \times \mu_{max,b} \frac{S}{K_s + S} \times \exp(-k_{inact} \times C) \times \exp\left[\left(-\frac{(T_{opt}-T)}{(T_{opt}-T_i)}\right)^2\right] \times X_b - Y_n \times k_{cn} \times S \times C + a(Y_x \times k_{cx} \times X_b \times C + k_{mort} \times X_b) \quad (S78)$$

$$\frac{\partial X_b}{\partial t} + u \frac{\partial X_b}{\partial x} = \mu_{max,b} \frac{S}{K_s + S} \times \exp(-k_{inact} \times C) \times \exp\left[\left(-\frac{(T_{opt}-T)}{(T_{opt}-T_i)}\right)^2\right] \times X_b - Y_x \times k_{cx} \times X_b \times C - k_{mort} \times X_b - k_{dep} \times X_b + k_{det} \times \tau_w \times \frac{X_a}{R_h} \quad (S79)$$

$$\frac{dX_a}{dt} = \mu_{max,a} \times \exp\left(-\frac{k_{inact}}{k_r} \times C\right) \times \exp\left[\left(-\frac{(T_{opt}-T)}{(T_{opt}-T_i)}\right)^2\right] \times X_a - k_{mort} \times X_a + k_{dep} \times X_b \times R_h - k_{det} \times \tau_w \times X_a \quad (S80)$$

$$\frac{\partial T_P}{\partial t} + u \frac{\partial T_P}{\partial x} = -a_1 \times \log_e(b \times X_b) \times \exp\left[E_{K_d} \times \left(1 - \frac{293}{T+273}\right)\right] \times T_P \quad (S81)$$

$$\frac{\partial A}{\partial t} + u \frac{\partial A}{\partial x} = (a_2 \times X_b + Y_{pf}) \times \exp\left[E_{Y_f} \times \left(1 - \frac{293}{T+273}\right)\right] \times a_1 \times \log_e(b \times X_b) \times \exp\left[E_{K_d} \times \left(1 - \frac{293}{T+273}\right)\right] \times T_P \quad (S82)$$

$$\frac{\partial F_1}{\partial t} + u \frac{\partial F_1}{\partial x} = -k_1 \times C \times F_1 \quad (S83)$$

$$\frac{\partial F_2}{\partial t} + u \frac{\partial F_2}{\partial x} = -k_2 \times C \times F_2 \quad (S84)$$

$$\frac{\partial P}{\partial t} + u \frac{\partial P}{\partial x} = Y_{f1} \times k_1 \times C \times F_1 + Y_{f2} \times k_2 \times C \times F_2 \quad (S85)$$

Module ‘234’

$$\frac{\partial C}{\partial t} + u \frac{\partial C}{\partial x} = -k_{cn} \times N \times C - Y_1 \times k_1 \times C \times F_1 - Y_2 \times k_2 \times C \times F_2 - k_{cx} \times X_b \times C - \frac{k_w \times k_f}{(k_w + k_f) \times R_h} \times C \quad (S86)$$

$$\frac{\partial N}{\partial t} + u \frac{\partial N}{\partial x} = -\frac{1}{Y} \times \mu_{max,b} \frac{S}{K_s + S} \times \exp(-k_{inact} \times C) \times \exp\left[\left(-\frac{(T_{opt}-T)}{(T_{opt}-T_i)}\right)^2\right] \times X_b - Y_n \times k_{cn} \times N \times C + a(Y_x \times k_{cx} \times X_b \times C + k_{mort} \times X_b) \quad (S87)$$

$$\frac{\partial S}{\partial t} + u \frac{\partial S}{\partial x} = -\frac{1}{Y} \times \mu_{max,b} \frac{S}{K_s + S} \times \exp(-k_{inact} \times C) \times \exp\left[\left(-\frac{(T_{opt}-T)}{(T_{opt}-T_i)}\right)^2\right] \times X_b - Y_n \times k_{cn} \times S \times C + a(Y_x \times k_{cx} \times X_b \times C + k_{mort} \times X_b) \quad (S88)$$

$$\frac{\partial X_b}{\partial t} + u \frac{\partial X_b}{\partial x} = \mu_{max,b} \frac{S}{K_s + S} \times \exp(-k_{inact} \times C) \times \exp\left[\left(-\frac{(T_{opt}-T)}{(T_{opt}-T_i)}\right)^2\right] \times X_b - Y_x \times k_{cx} \times X_b \times C - k_{mort} \times X_b \quad (S89)$$

$$\frac{\partial H}{\partial t} + u \frac{\partial H}{\partial x} = Y_h \times k_{cn} \times N \times C \quad (S90)$$

$$\frac{\partial T_P}{\partial t} + u \frac{\partial T_P}{\partial x} = -a_1 \times \log_e(b \times X_b) \times \exp\left[E_{K_d} \times \left(1 - \frac{293}{T+273}\right)\right] \times T_P \quad (S91)$$

$$\frac{\partial A}{\partial t} + u \frac{\partial A}{\partial x} = (a_2 \times X_b + Y_{pf}) \times \exp\left[E_{Y_f} \times \left(1 - \frac{293}{T+273}\right)\right] \times a_1 \times \log_e(b \times X_b) \times \exp\left[E_{K_d} \times \left(1 - \frac{293}{T+273}\right)\right] \times T_P \quad (S92)$$

$$\frac{\partial F_1}{\partial t} + u \frac{\partial F_1}{\partial x} = -k_1 \times C \times F_1 \quad (S93)$$

$$\frac{\partial F_2}{\partial t} + u \frac{\partial F_2}{\partial x} = -k_2 \times C \times F_2 \quad (S94)$$

$$\frac{\partial P}{\partial t} + u \frac{\partial P}{\partial x} = Y_{f1} \times k_1 \times C \times F_1 + Y_{f2} \times k_2 \times C \times F_2 \quad (S95)$$

Module ‘1234’

$$\frac{\partial C}{\partial t} + u \frac{\partial C}{\partial x} = -k_{cn} \times N \times C - Y_1 \times k_1 \times C \times F_1 - Y_2 \times k_2 \times C \times F_2 - k_{cx} \times X_b \times C - \frac{k_w \times k_f}{(k_w + k_f) \times R_h} \times C \quad (S96)$$

$$\frac{\partial N}{\partial t} + u \frac{\partial N}{\partial x} = -\frac{1}{Y} \times \mu_{max,b} \frac{S}{K_s + S} \times \exp(-k_{inact} \times C) \times \exp\left[\left(-\frac{(T_{opt}-T)}{(T_{opt}-T_i)}\right)^2\right] \times X_b - Y_n \times k_{cn} \times N \times C + a(Y_x \times k_{cx} \times X_b \times C + k_{mort} \times X_b) \quad (S97)$$

$$\frac{\partial S}{\partial t} + u \frac{\partial S}{\partial x} = -\frac{1}{Y} \times \mu_{max,b} \frac{S}{K_s + S} \times \exp(-k_{inact} \times C) \times \exp\left[\left(-\frac{(T_{opt}-T)}{(T_{opt}-T_i)}\right)^2\right] \times X_b - Y_n \times k_{cn} \times S \times C + a(Y_x \times k_{cx} \times X_b \times C + k_{mort} \times X_b) \quad (S98)$$

$$\frac{\partial X_b}{\partial t} + u \frac{\partial X_b}{\partial x} = \mu_{max,b} \frac{S}{K_s + S} \times \exp(-k_{inact} \times C) \times \exp\left[\left(-\frac{(T_{opt}-T)}{(T_{opt}-T_i)}\right)^2\right] \times X_b - Y_x \times k_{cx} \times X_b \times C - k_{mort} \times X_b - k_{dep} \times X_b + k_{det} \times \tau_w \times \frac{X_a}{R_h} \quad (S99)$$

$$\frac{dX_a}{dt} = \mu_{max,a} \times \exp\left(-\frac{k_{inact}}{k_r} \times C\right) \times \exp\left[\left(-\frac{(T_{opt}-T)}{(T_{opt}-T_i)}\right)^2\right] \times X_a - k_{mort} \times X_a + k_{dep} \times X_b \times R_h - k_{det} \times \tau_w \times X_a \quad (S100)$$

$$\frac{\partial H}{\partial t} + u \frac{\partial H}{\partial x} = Y_h \times k_{cn} \times N \times C \quad (S101)$$

$$\frac{\partial T_P}{\partial t} + u \frac{\partial T_P}{\partial x} = -a_1 \times \log_e(b \times X_b) \times \exp\left[E_{K_d} \times \left(1 - \frac{293}{T+273}\right)\right] \times T_P \quad (S102)$$

$$\frac{\partial A}{\partial t} + u \frac{\partial A}{\partial x} = (a_2 \times X_b + Y_{pf}) \times \exp\left[E_{Y_f} \times \left(1 - \frac{293}{T+273}\right)\right] \times a_1 \times \log_e(b \times X_b) \times \exp\left[E_{K_d} \times \left(1 - \frac{293}{T+273}\right)\right] \times T_P \quad (S103)$$

$$\frac{\partial F_1}{\partial t} + u \frac{\partial F_1}{\partial x} = -k_1 \times C \times F_1 \quad (S104)$$

$$\frac{\partial F_2}{\partial t} + u \frac{\partial F_2}{\partial x} = -k_2 \times C \times F_2 \quad (S105)$$

$$\frac{\partial P}{\partial t} + u \frac{\partial P}{\partial x} = Y_{f1} \times k_1 \times C \times F_1 + Y_{f2} \times k_2 \times C \times F_2 \quad (S106)$$

**Table S1.** Values of the reaction rate coefficients reported in the literature and used in EPANET-C.

| Model Parameter                                                                        | Notation      | Unit   | Values Range<br>Reported in the<br>Literature | Reference                                                              | Value Used in<br>EPANET-C |
|----------------------------------------------------------------------------------------|---------------|--------|-----------------------------------------------|------------------------------------------------------------------------|---------------------------|
| Second-order rate constant<br>corresponding to chlorine-TOC/BDOC<br>reactions          | $k_{cn}$      | L/mg/h | 0.148–0.180                                   | Kiene et al. [1]                                                       | 0.164                     |
| Second-order rate constant<br>corresponding to chlorine-microbial<br>biomass reactions | $k_{cx}$      | L/mg/h | 0.015–0.018                                   | Abokifa et al. [2]                                                     | 0.016                     |
| Second-order rate constant<br>corresponding to chlorine-PFOAB<br>reactions             | $k_1$         | L/mg/h | 0.003–0.050                                   | Abhijith and Ostfeld [3]                                               | 0.02                      |
| Second-order rate constant<br>corresponding to chlorine-PFOAAmS<br>reactions           | $k_2$         | L/mg/h | 0.003–0.080                                   |                                                                        | 0.03                      |
| Yield coefficient for chlorine<br>corresponding to chlorine-PFOAB<br>reactions         | $Y_1$         | mg/ng  | $7.5 \times 10^{-6}$ – $2.5 \times 10^{-5}$   |                                                                        | $8.5 \times 10^{-6}$      |
| Yield coefficient for chlorine<br>corresponding to chlorine-PFOAAmS<br>reactions       | $Y_2$         | mg/ng  | $7.5 \times 10^{-6}$ – $3.0 \times 10^{-5}$   |                                                                        | $2.0 \times 10^{-5}$      |
| Wall decay coefficient for chlorine                                                    | $k_w$         | m/h    | $3.7 \times 10^{-4}$ –0.052                   | Abhijith and Mohan [4]; Camper<br>[5]; Munavalli and MohanKumar<br>[6] | $3.7 \times 10^{-4}$      |
| Maximum specific growth rate of<br>planktonic microbes                                 | $\mu_{max,b}$ | 1/h    | 0.05–1.512                                    | Bois et al. [7]                                                        | 1.512                     |
| Maximum specific growth rate of<br>biofilm microbes                                    | $\mu_{max,a}$ | 1/h    | 0.003–0.029                                   |                                                                        | 0.003                     |

| Model Parameter                                                                            | Notation    | Unit   | Values Range<br>Reported in the<br>Literature | Reference                                                            | Value Used in<br>EPANET-C |
|--------------------------------------------------------------------------------------------|-------------|--------|-----------------------------------------------|----------------------------------------------------------------------|---------------------------|
| Half-saturation constant                                                                   | $K_s$       | mg/L   | 0.05–1.20                                     | Billen et al. [8]                                                    | 0.195                     |
| Microbial growth yield coefficient                                                         | $Y$         | CFU/mg | $5.0 \times 10^7$ – $1.5 \times 10^9$         | Bois et al. [7]                                                      | $7.0 \times 10^7$         |
| Microbial growth inactivation constant                                                     | $k_{inact}$ | L/mg   | 0.05–5.0                                      | Abokifa et al. [2]; Bois et al. [7];<br>Munavalli and MohanKumar [6] | 0.35                      |
| Yield coefficient for microbes<br>corresponding to chlorine-microbial<br>biomass reactions | $Y_x$       | CFU/mg | $3.4 \times 10^8$ – $7.4 \times 10^8$         | Bois et al. [7]                                                      | $3.4 \times 10^8$         |
| Dead microbial fraction getting<br>converted as BDOC after cell lysis                      | $a$         | mg/CFU | $3.0 \times 10^{-10}$ – $3.0 \times 10^{-11}$ | Dukan et al. [9]                                                     | $3.0 \times 10^{-10}$     |
| Microbial mortality rate constant                                                          | $k_{mort}$  | 1/h    | 0.003–0.065                                   | Bois et al. [7]; Munavalli and<br>MohanKumar [6]                     | 0.023                     |
| Microbial deposition rate constant                                                         | $k_{dep}$   | 1/h    | 0.020–1.512                                   | Bois et al. [7]                                                      | 0.2                       |
| Microbial detachment rate coefficient                                                      | $k_{det}$   | m.h/g  | $1.9 \times 10^{-10}$ – $1.9 \times 10^{-11}$ | Schrottenbaum et al. [10]                                            | $1.9 \times 10^{-10}$     |
| Yield coefficient for TOC/BDOC<br>corresponding to chlorine-TOC/BDOC<br>reactions          | $Y_n$       | mg/mg  | 0.4–4.88                                      | Clark [11]                                                           | 0.98                      |
| Reaction yield coefficient corresponding<br>to THMs formation from organic matter          | $Y_h$       | µg/mg  | 5.68–188.20                                   | Clark [11]; Clark and Sivaganesan<br>[12]                            | 112.435                   |
| 2,4,6-TCP degradation constant                                                             | $a_1$       | 1/h    | $2.0 \times 10^{-4}$ –0.002                   |                                                                      | 0.002                     |
| Microbial activation rate constant<br>concerning 2,4,6-TCP bioconversion                   | $b$         | L/CFU  | 5500– $5.5 \times 10^4$                       |                                                                      | $5.5 \times 10^4$         |
| Reaction yield coefficient concerning<br>2,4,6-TCP bioconversion                           | $a_2$       | L/CFU  | $4.3 \times 10^{-6}$ – $4.3 \times 10^{-7}$   | Abhijith and Ostfeld [13]                                            | $4.3 \times 10^{-7}$      |
| Pipe material dependent constant<br>concerning 2,4,6-TCP bioconversion                     | $Y_{pf}$    | ng/ng  | 0.163–1.049                                   |                                                                      | 0.163                     |
| Yield-coefficient for PFOA formation<br>from chlorine-PFOAB reactions                      | $Y_{f1}$    | ng/ng  | 0.18–0.55                                     | Abhijith and Ostfeld [3]                                             | 0.36                      |



| Model Parameter                                                         | Notation | Unit  | Values Range<br>Reported in the<br>Literature | Reference | Value Used in<br>EPANET-C |
|-------------------------------------------------------------------------|----------|-------|-----------------------------------------------|-----------|---------------------------|
| Yield-coefficient for PFOA formation<br>from chlorine-PFOAAmS reactions | $Y_{f1}$ | ng/ng | 0.26–0.55                                     |           | 0.41                      |

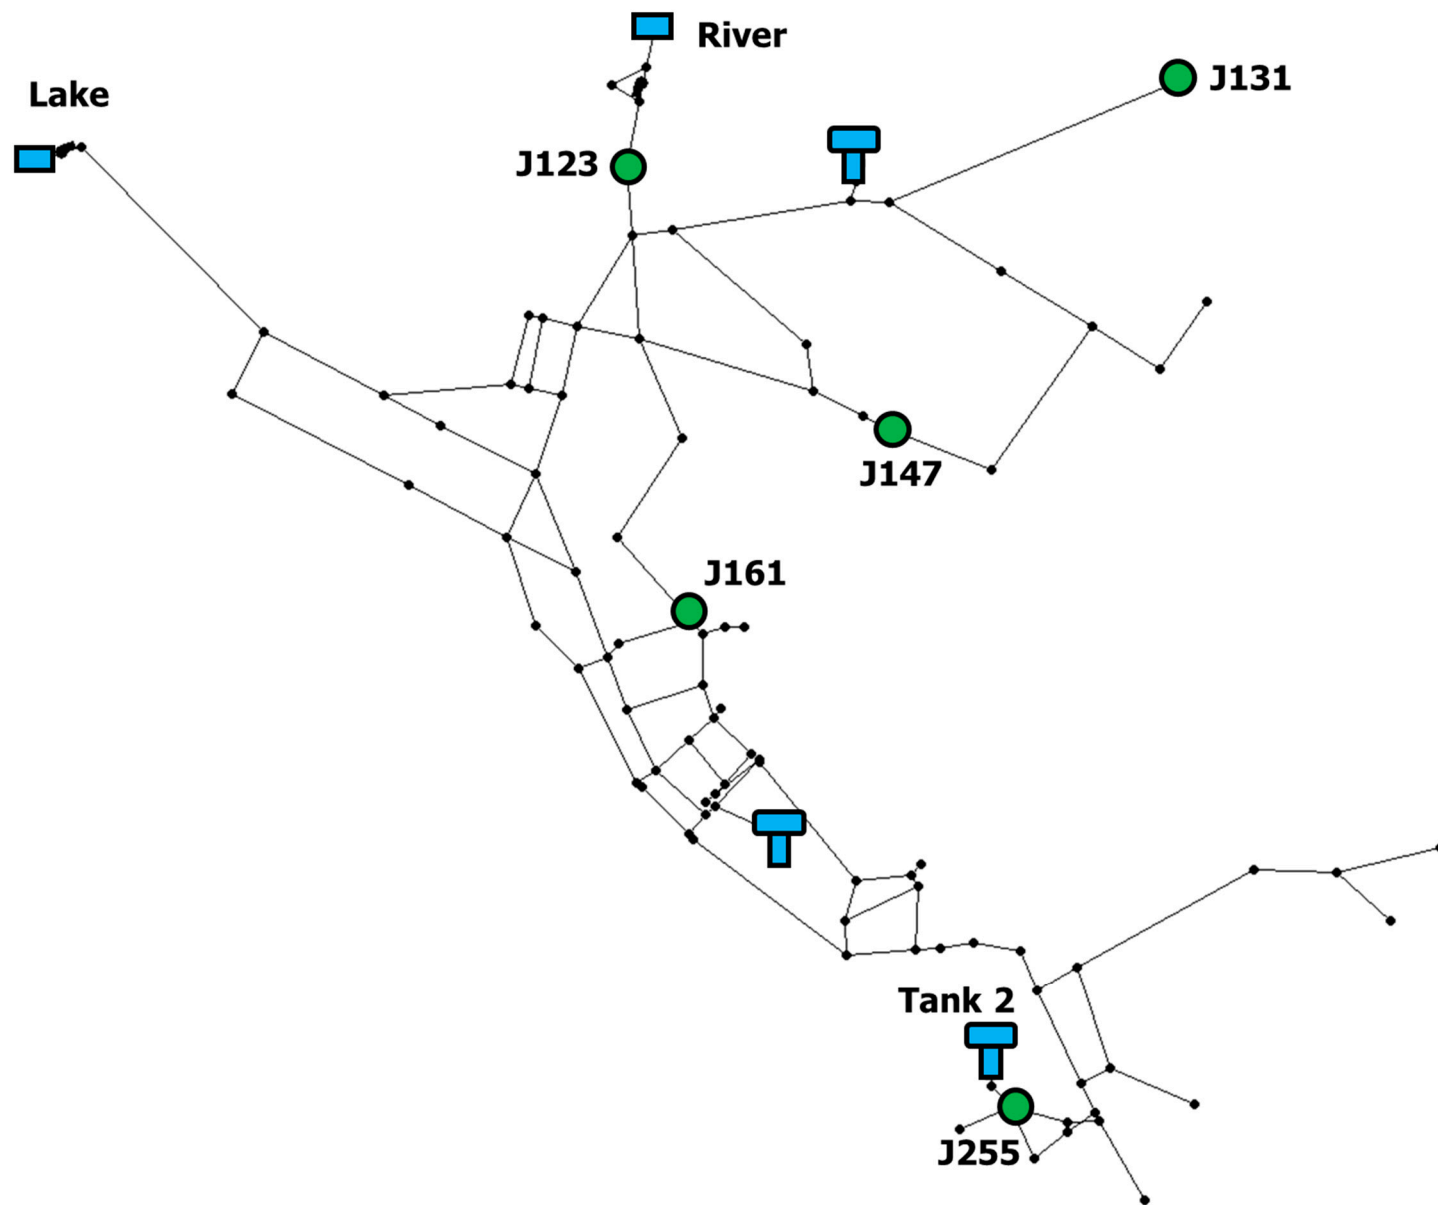

**Figure S1.** Schematic of North Marin Water District WDS or EPANET Example Network 3 (Test network 1).

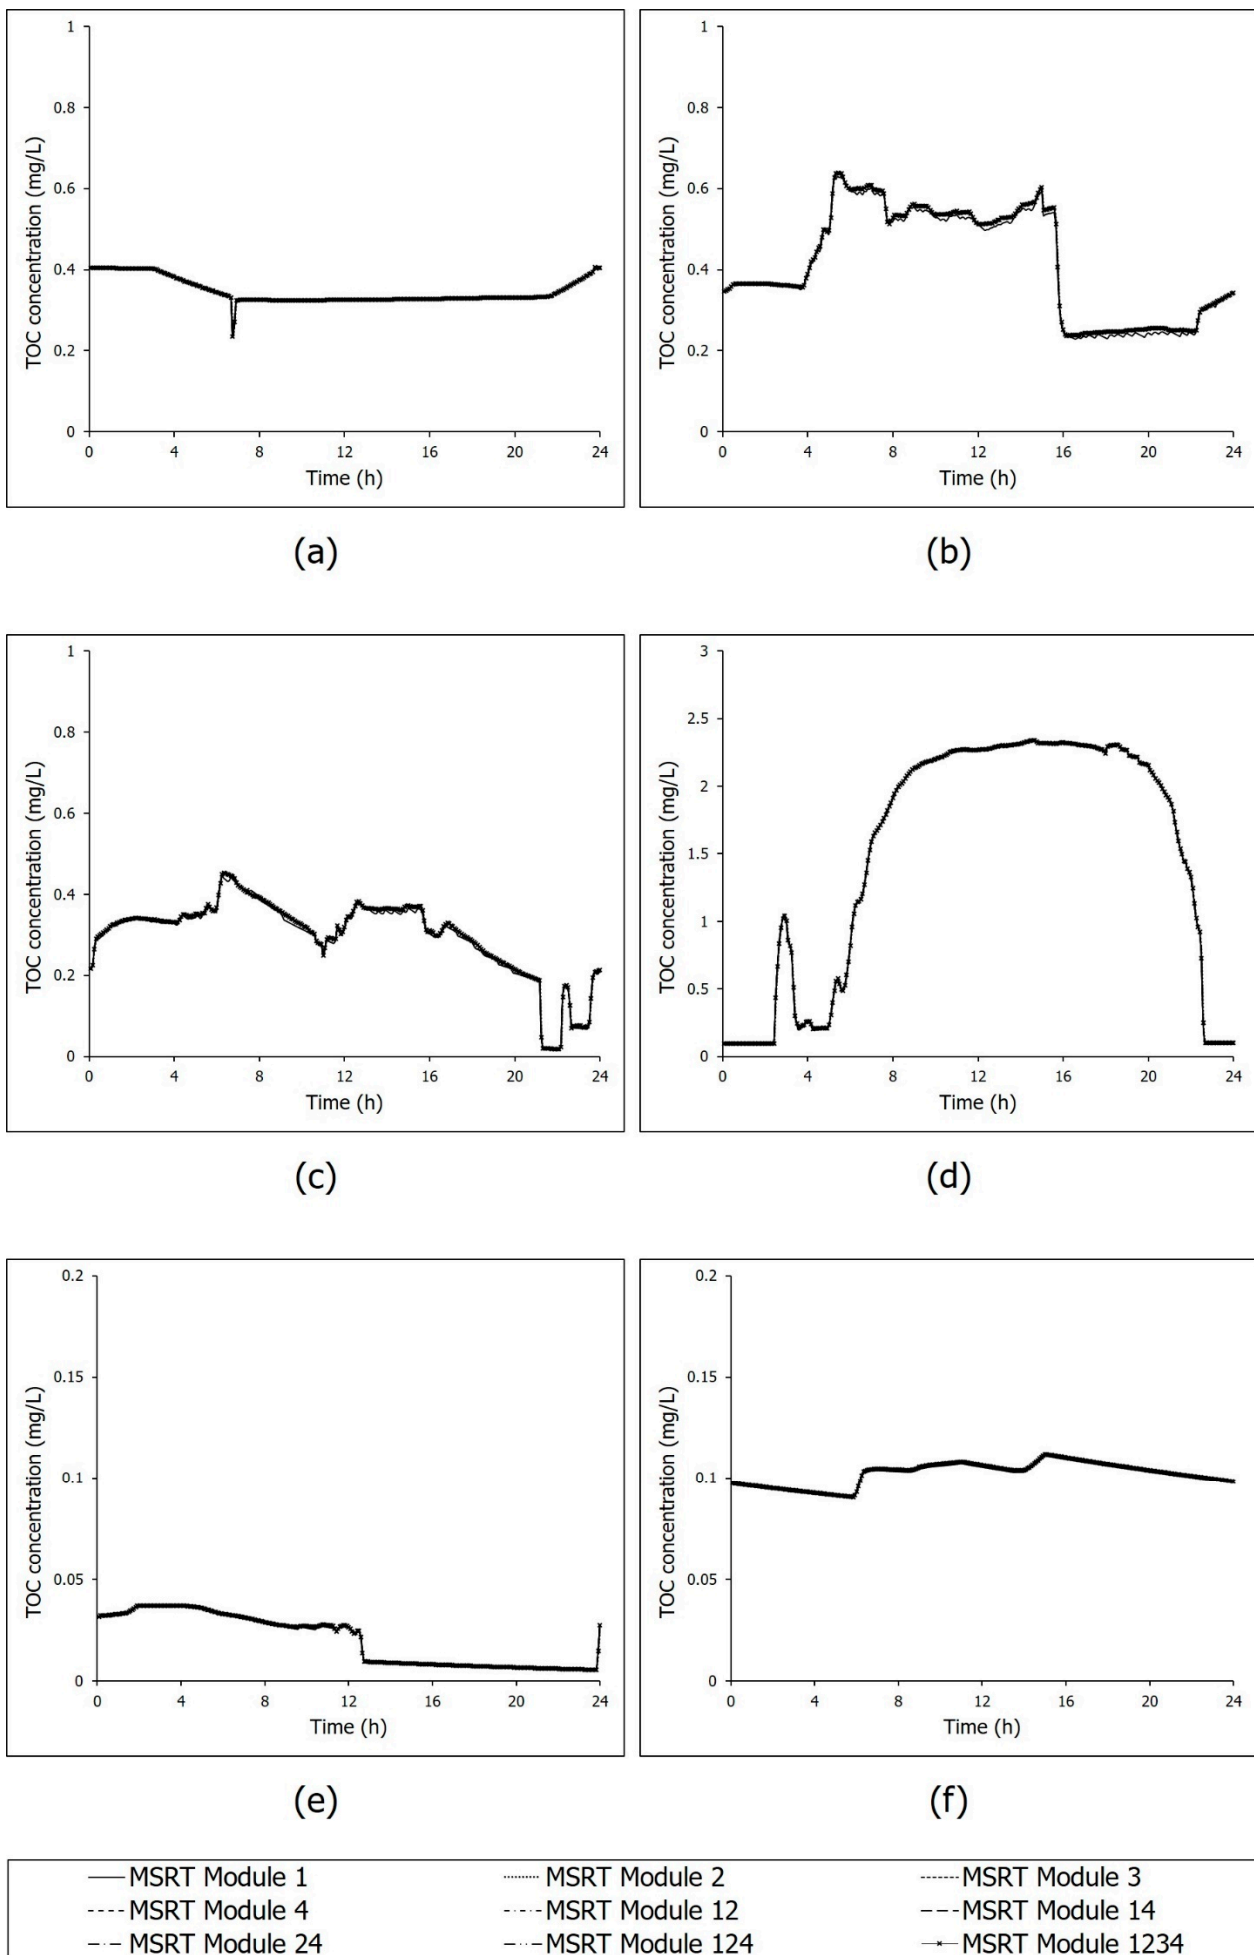

**Figure S2.** 24-h variations in TOC concentrations simulated with EPANET-C Modules 1, 2, 3, 4, 12, 14, 24, 124, and 1234 at network locations (a) J123, (b) J161, (c) J147, (d) J255, (e) J131, and (f) Tank 2 of Test network 1.

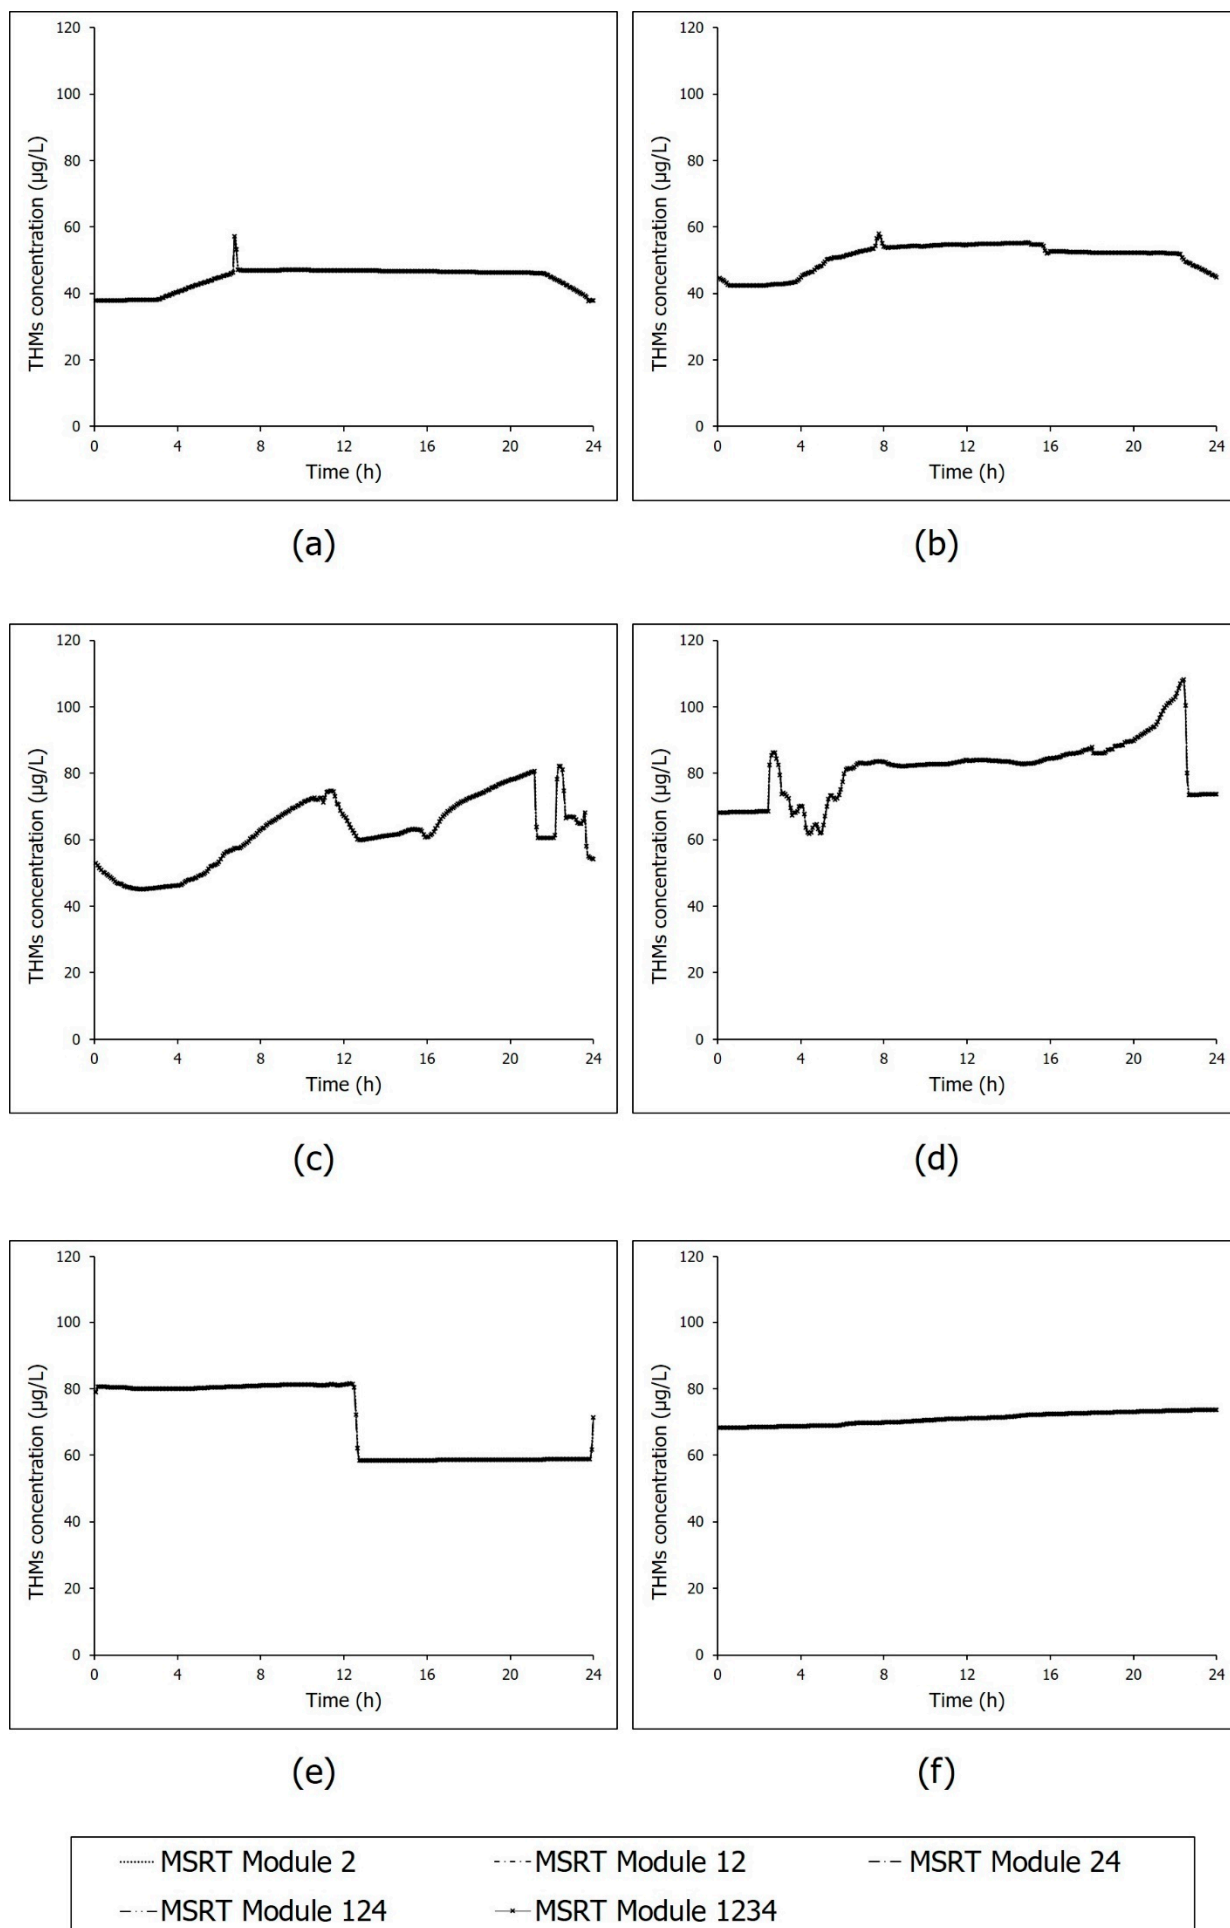

**Figure S3.** 24-h variations in THMs concentrations simulated with EPANET-C Modules 2, 12, 24, 124, and 1234 at network locations (a) J123, (b) J161, (c) J147, (d) J255, (e) J131, and (f) Tank 2 of Test network 1.

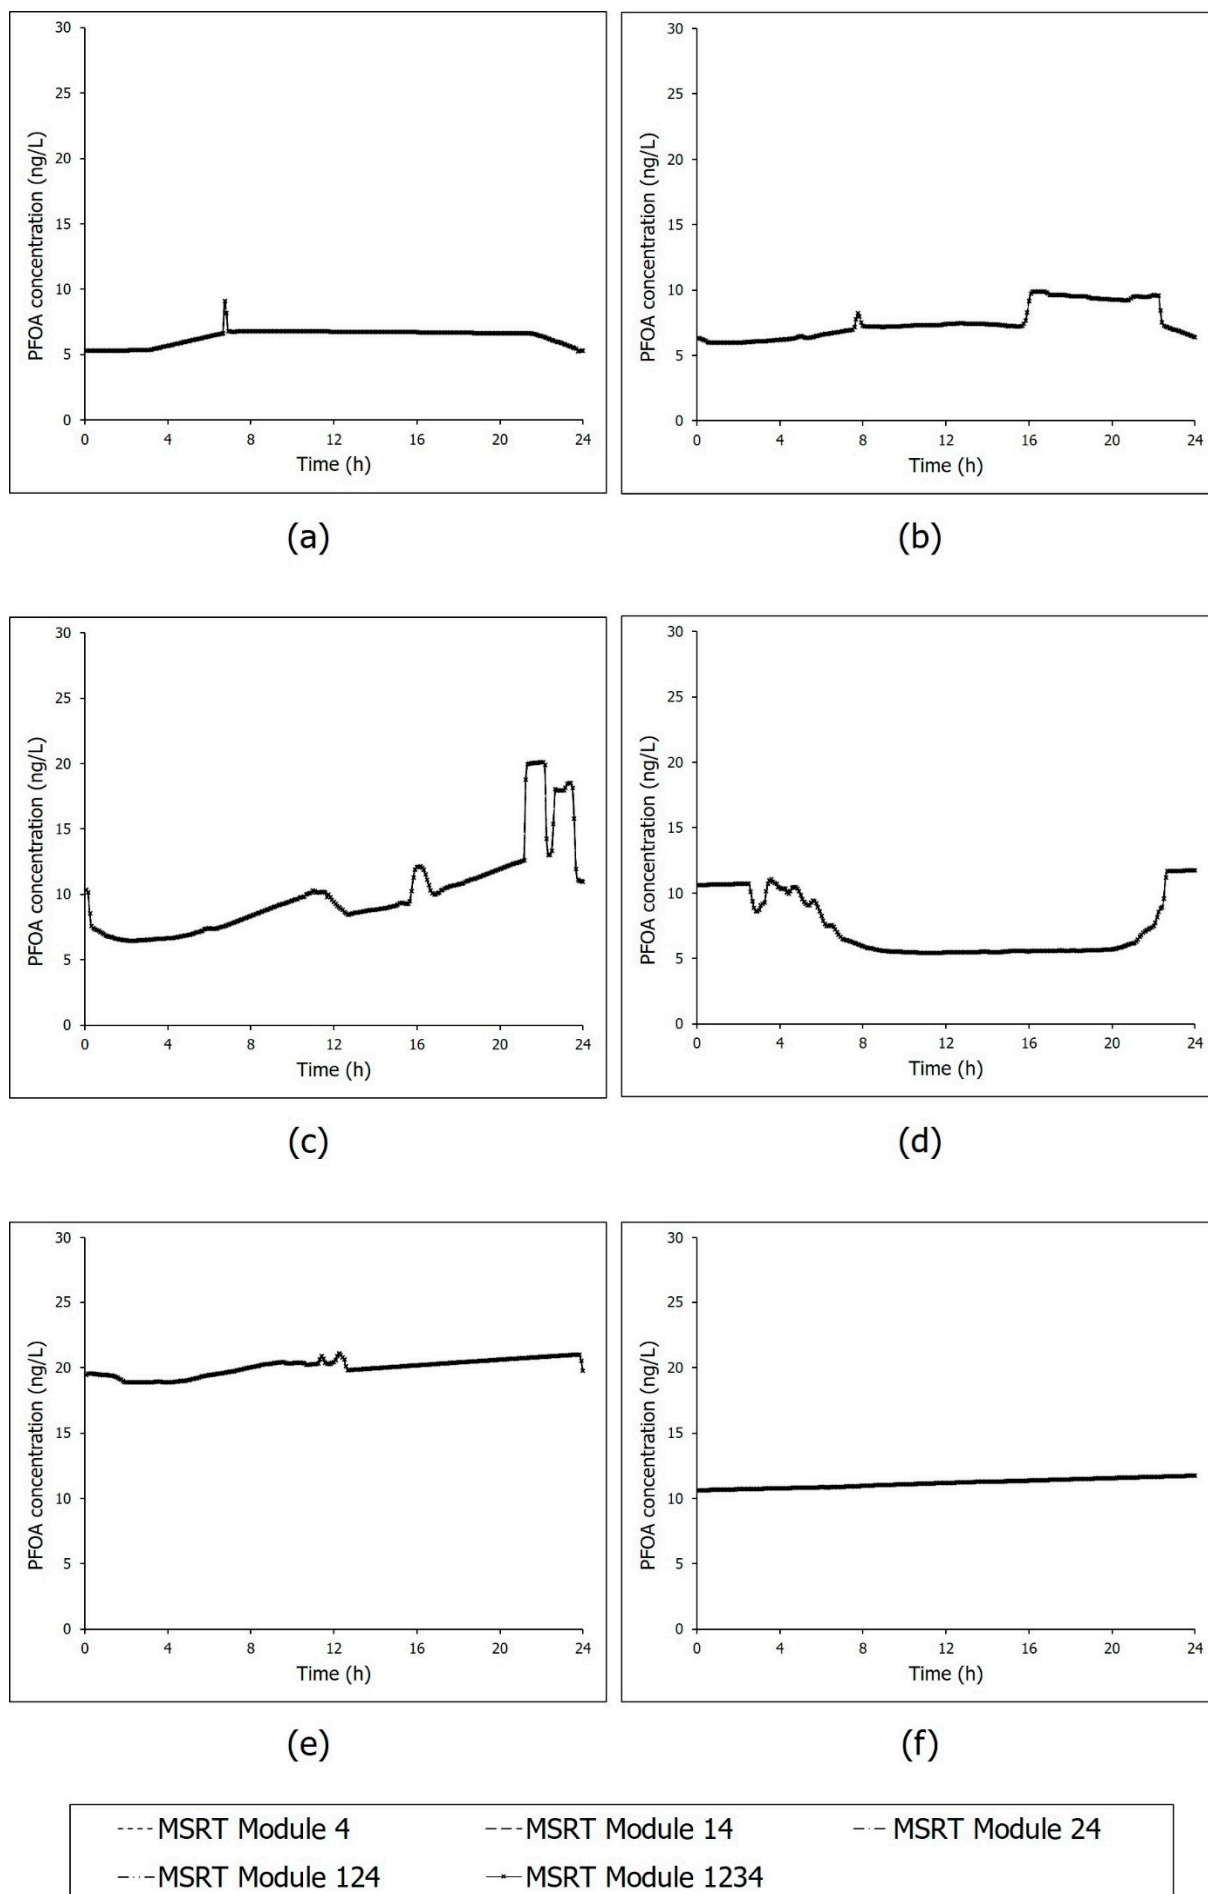

**Figure S4.** 24-h variations in PFOA concentrations simulated with EPANET-C Modules 4, 14, 24, 124, and 1234 at network locations (a) J123, (b) J161, (c) J147, (d) J255, (e) J131, and (f) Tank 2 of Test network 1.

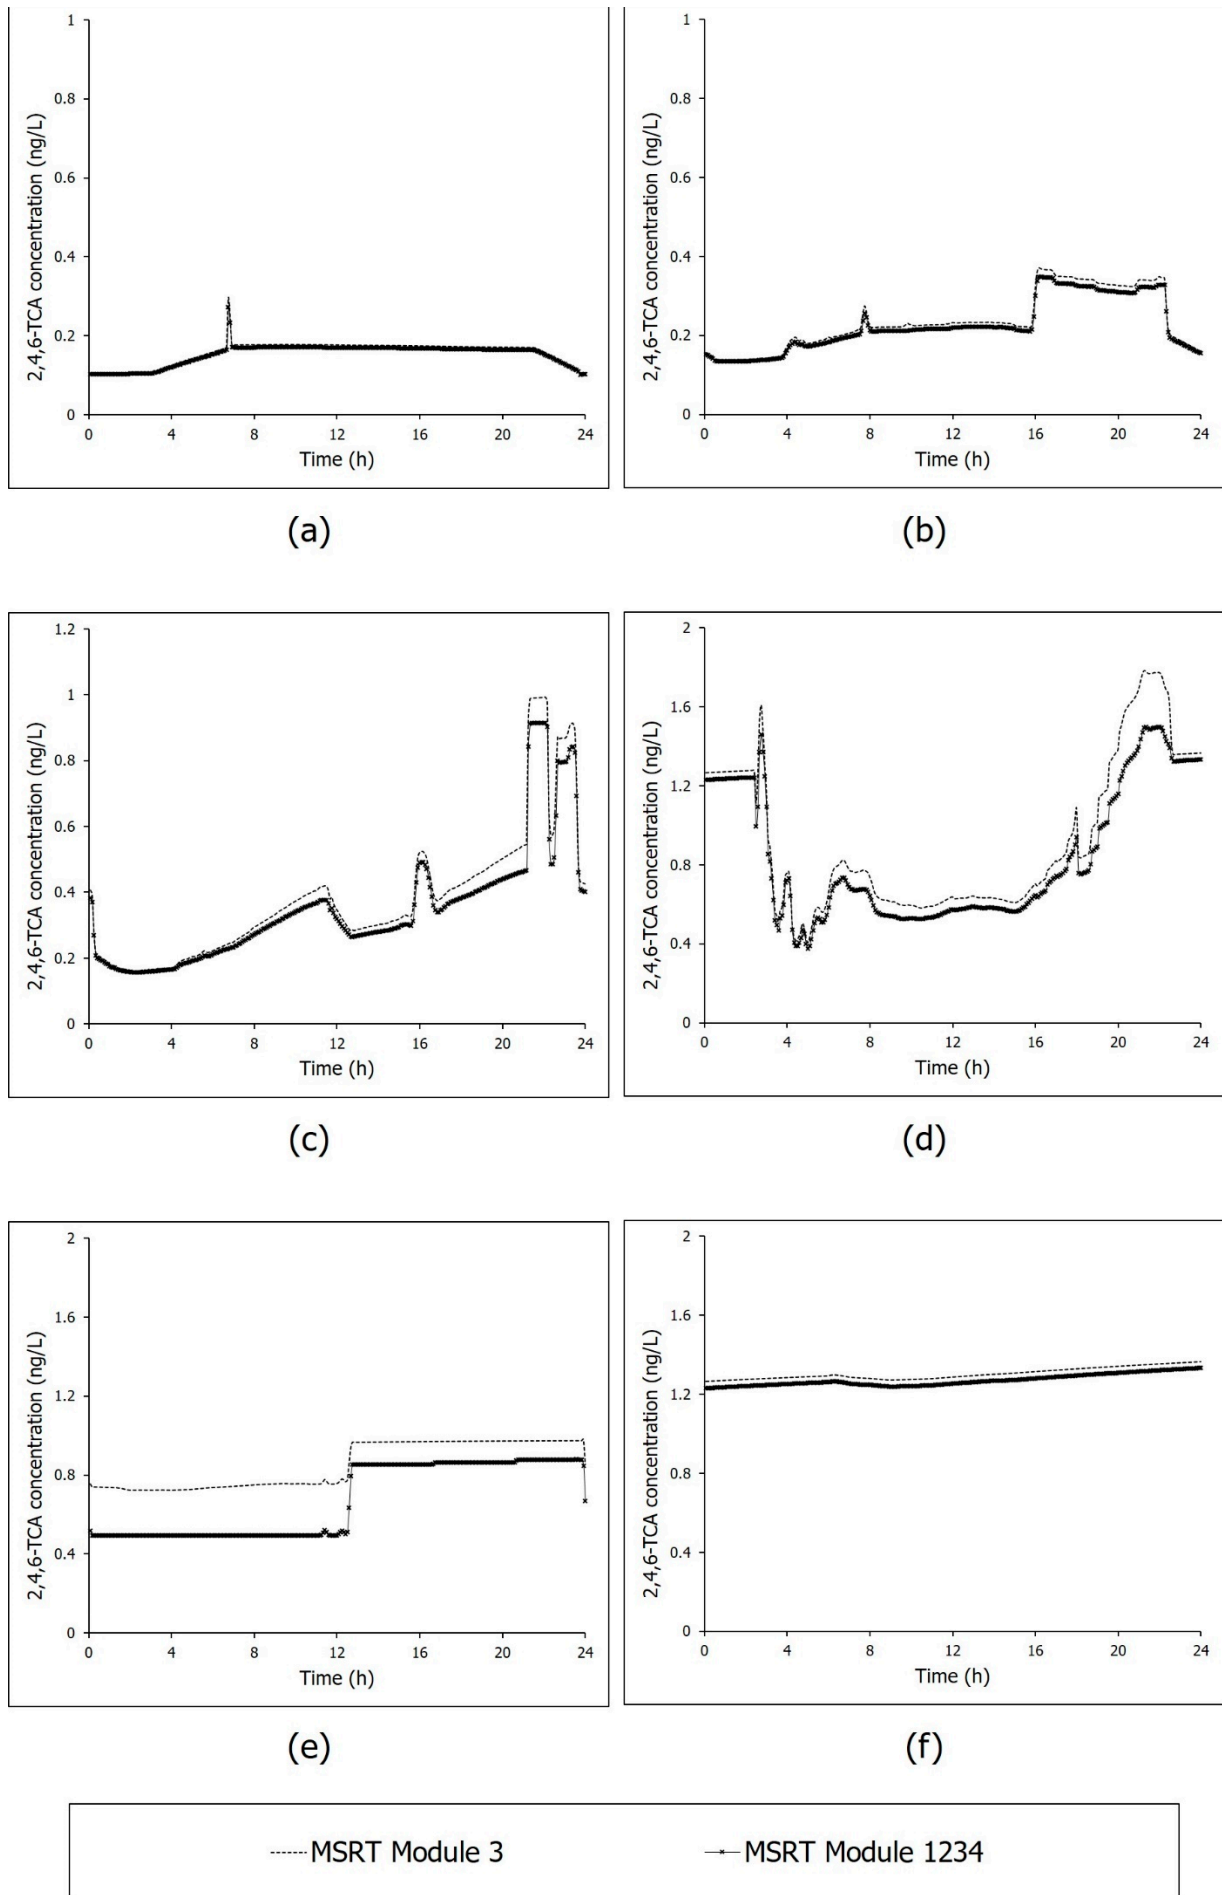

**Figure S5.** 24-h variations in 2,4,6-TCA concentrations simulated with EPANET-C Modules 3 and 1234 at network locations (a) J123, (b) J161, (c) J147, (d) J255, (e) J131, and (f) Tank 2 of Test network 1.

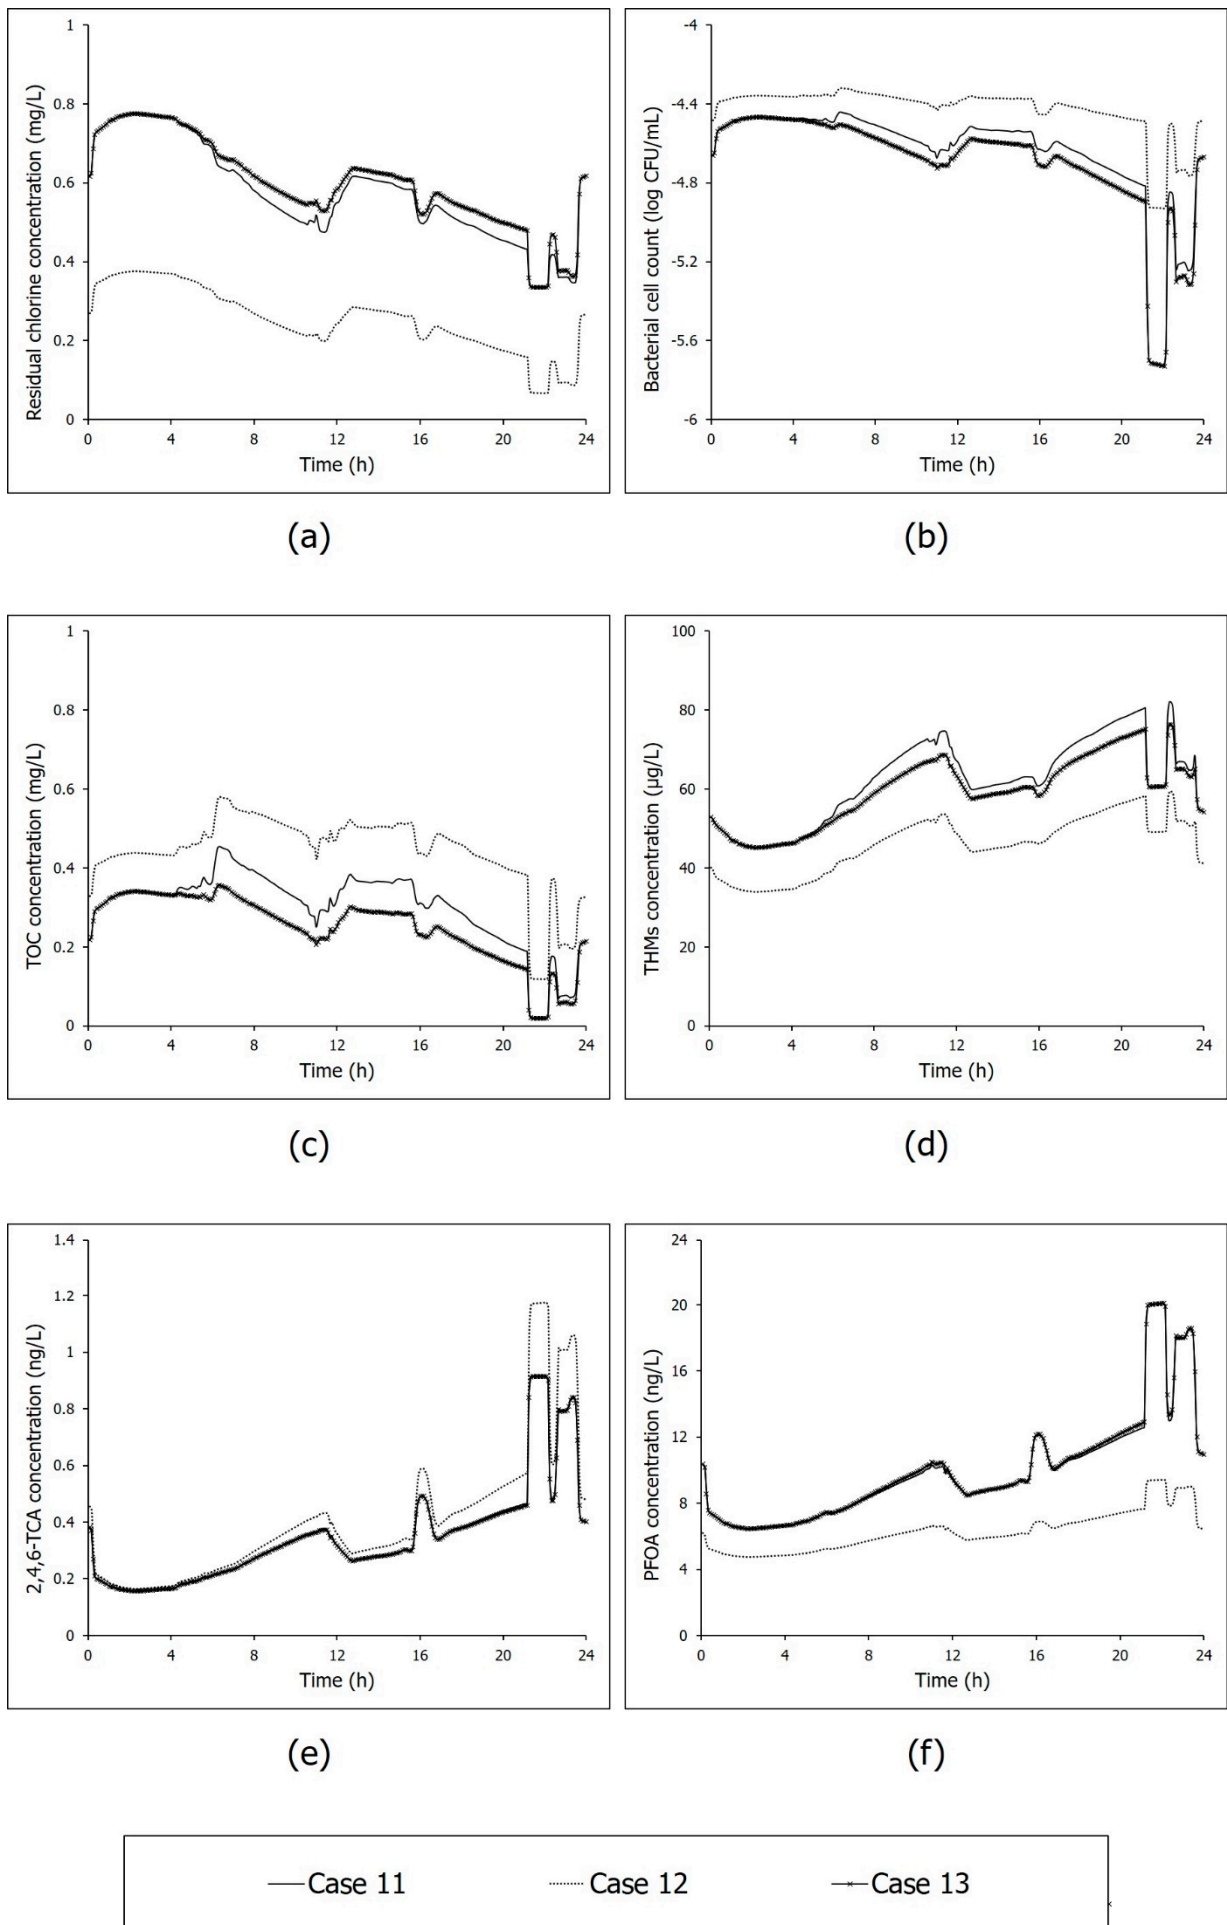

**Figure S6.** 24-h variations in (a) residual chlorine concentration, (b) planktonic bacterial cell count, (c) TOC concentration, (d) THMs concentration, (e) 2,4,6-TCA concentration, and (f) PFOA concentration simulated with EPANET-C Module 1234 under Cases 11, 12, and 13 at network location J147 of Test network 1.

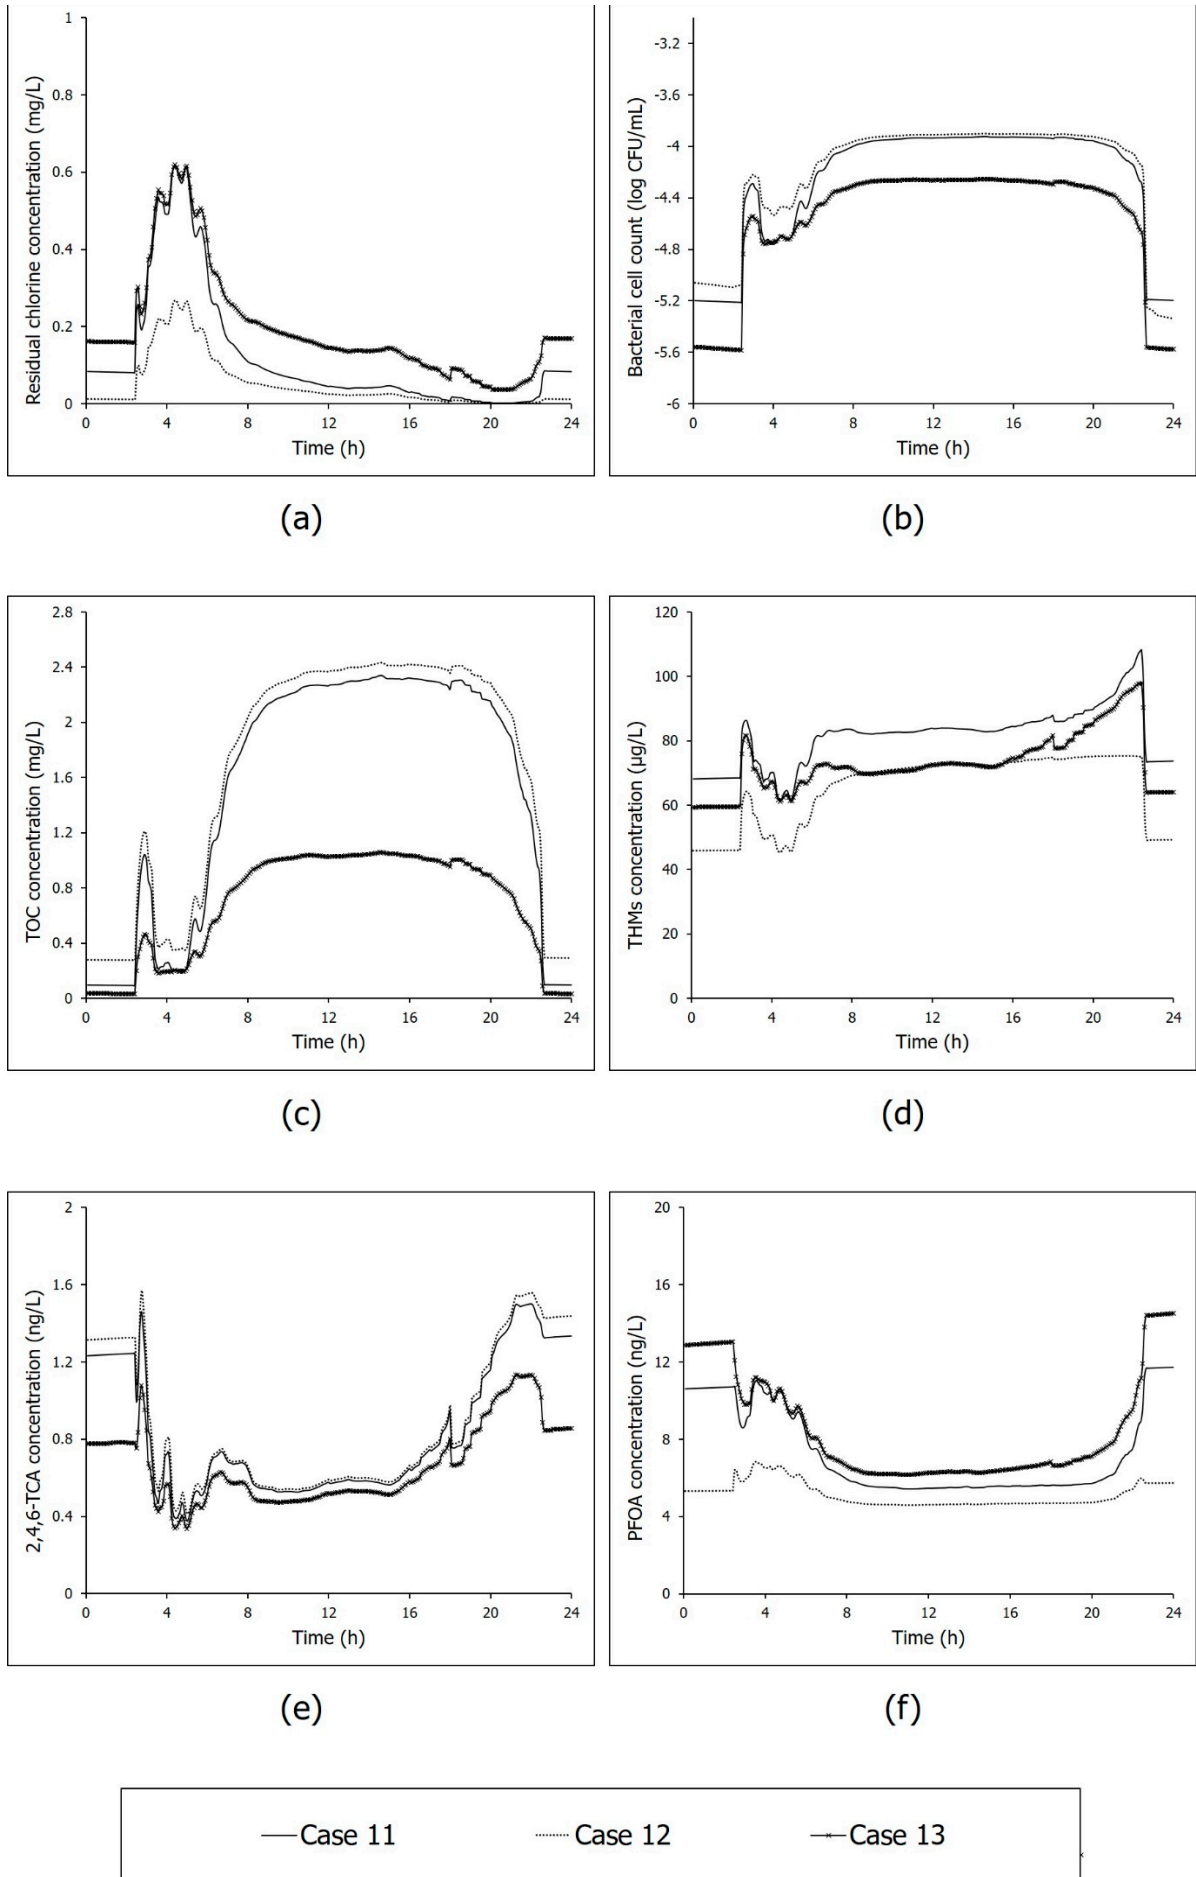

**Figure S7.** 24-h variations in (a) residual chlorine concentration, (b) planktonic bacterial cell count, (c) TOC concentration, (d) THMs concentration, (e) 2,4,6-TCA concentration, and (f) PFOA concentration simulated with EPANET-C Module 1234 under Cases 11, 12, and 13 at network location J255 of Test network 1.



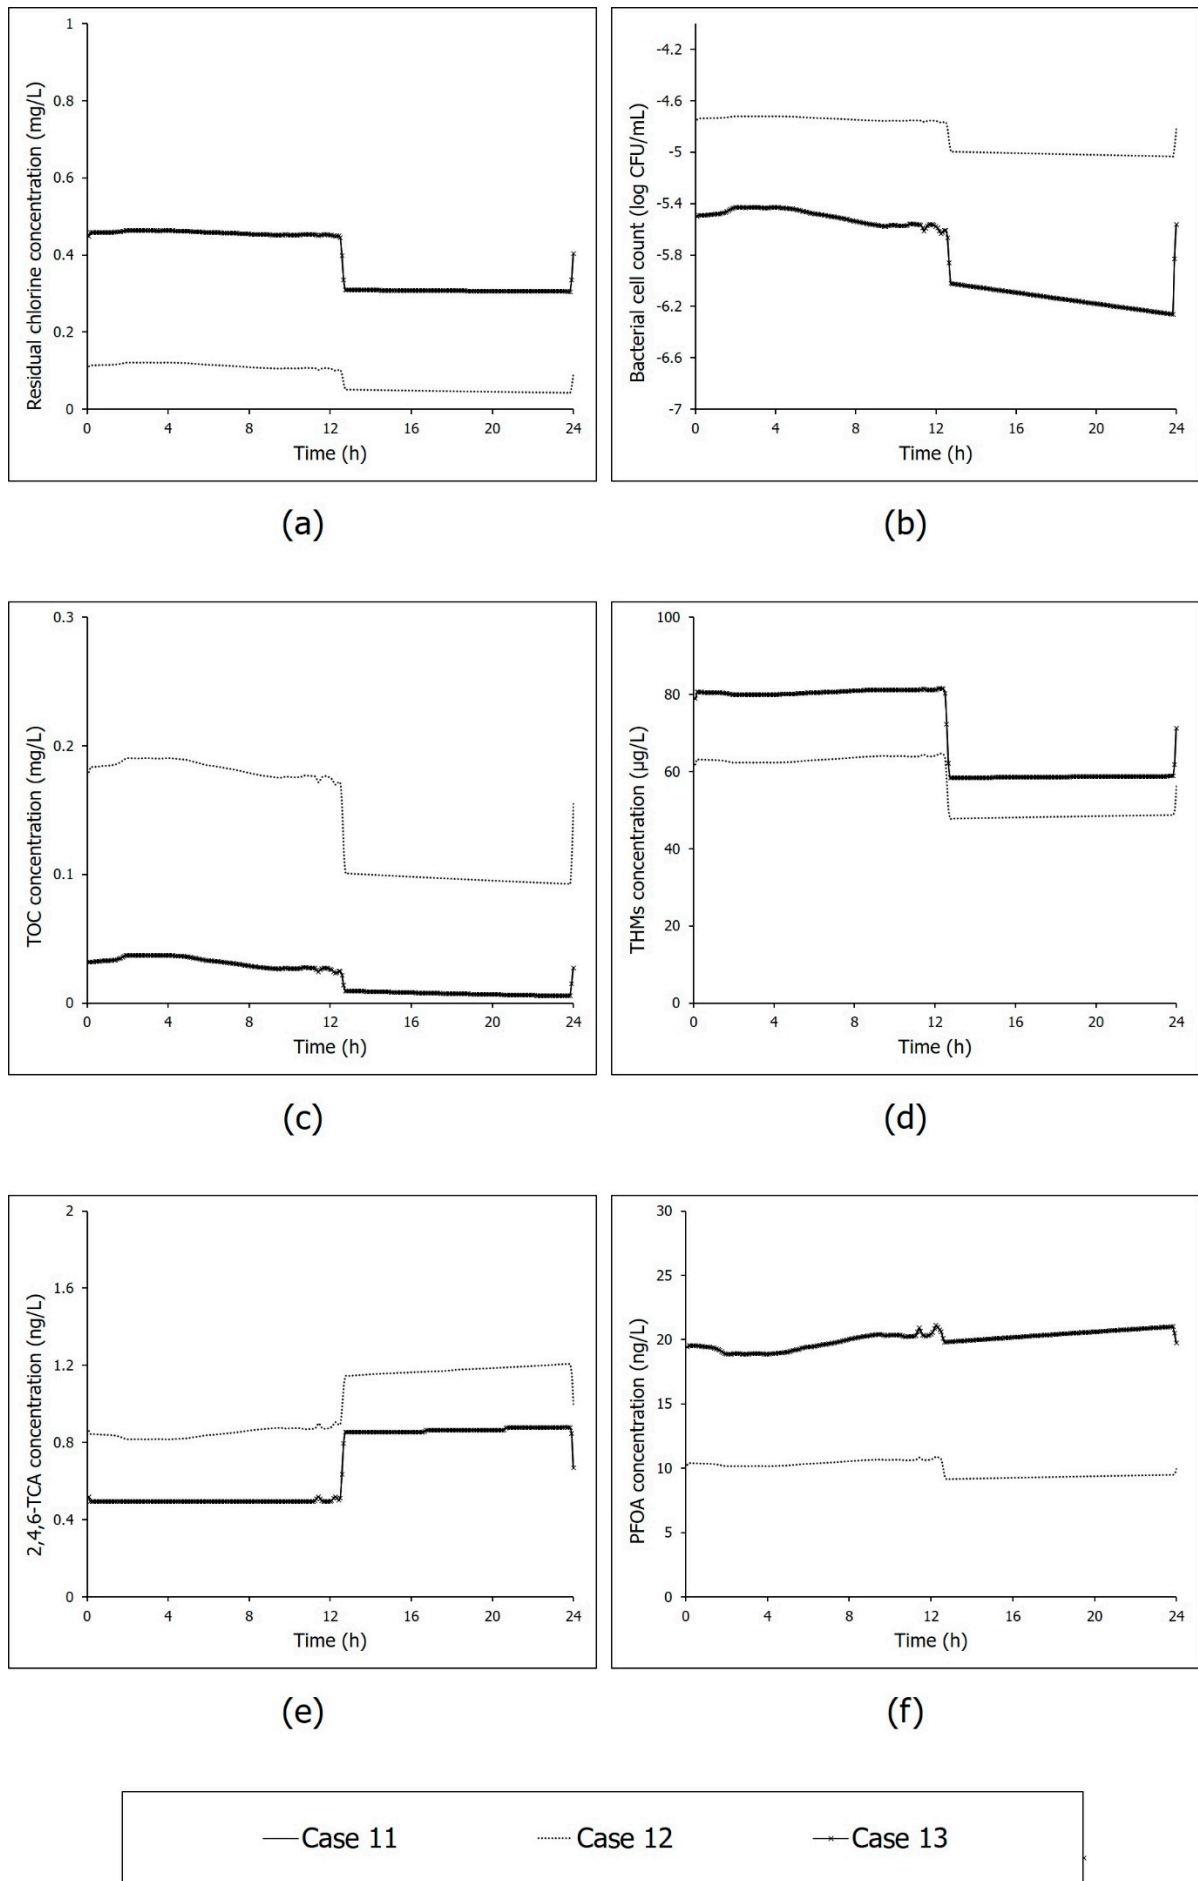

**Figure S8.** 24-h variations in (a) residual chlorine concentration, (b) planktonic bacterial cell count, (c) TOC concentration, (d) THMs concentration, (e) 2,4,6-TCA concentration, and (f) PFOA concentration simulated with EPANET-C Module 1234 under Cases 11, 12, and 13 at network location J131 of Test network 1.

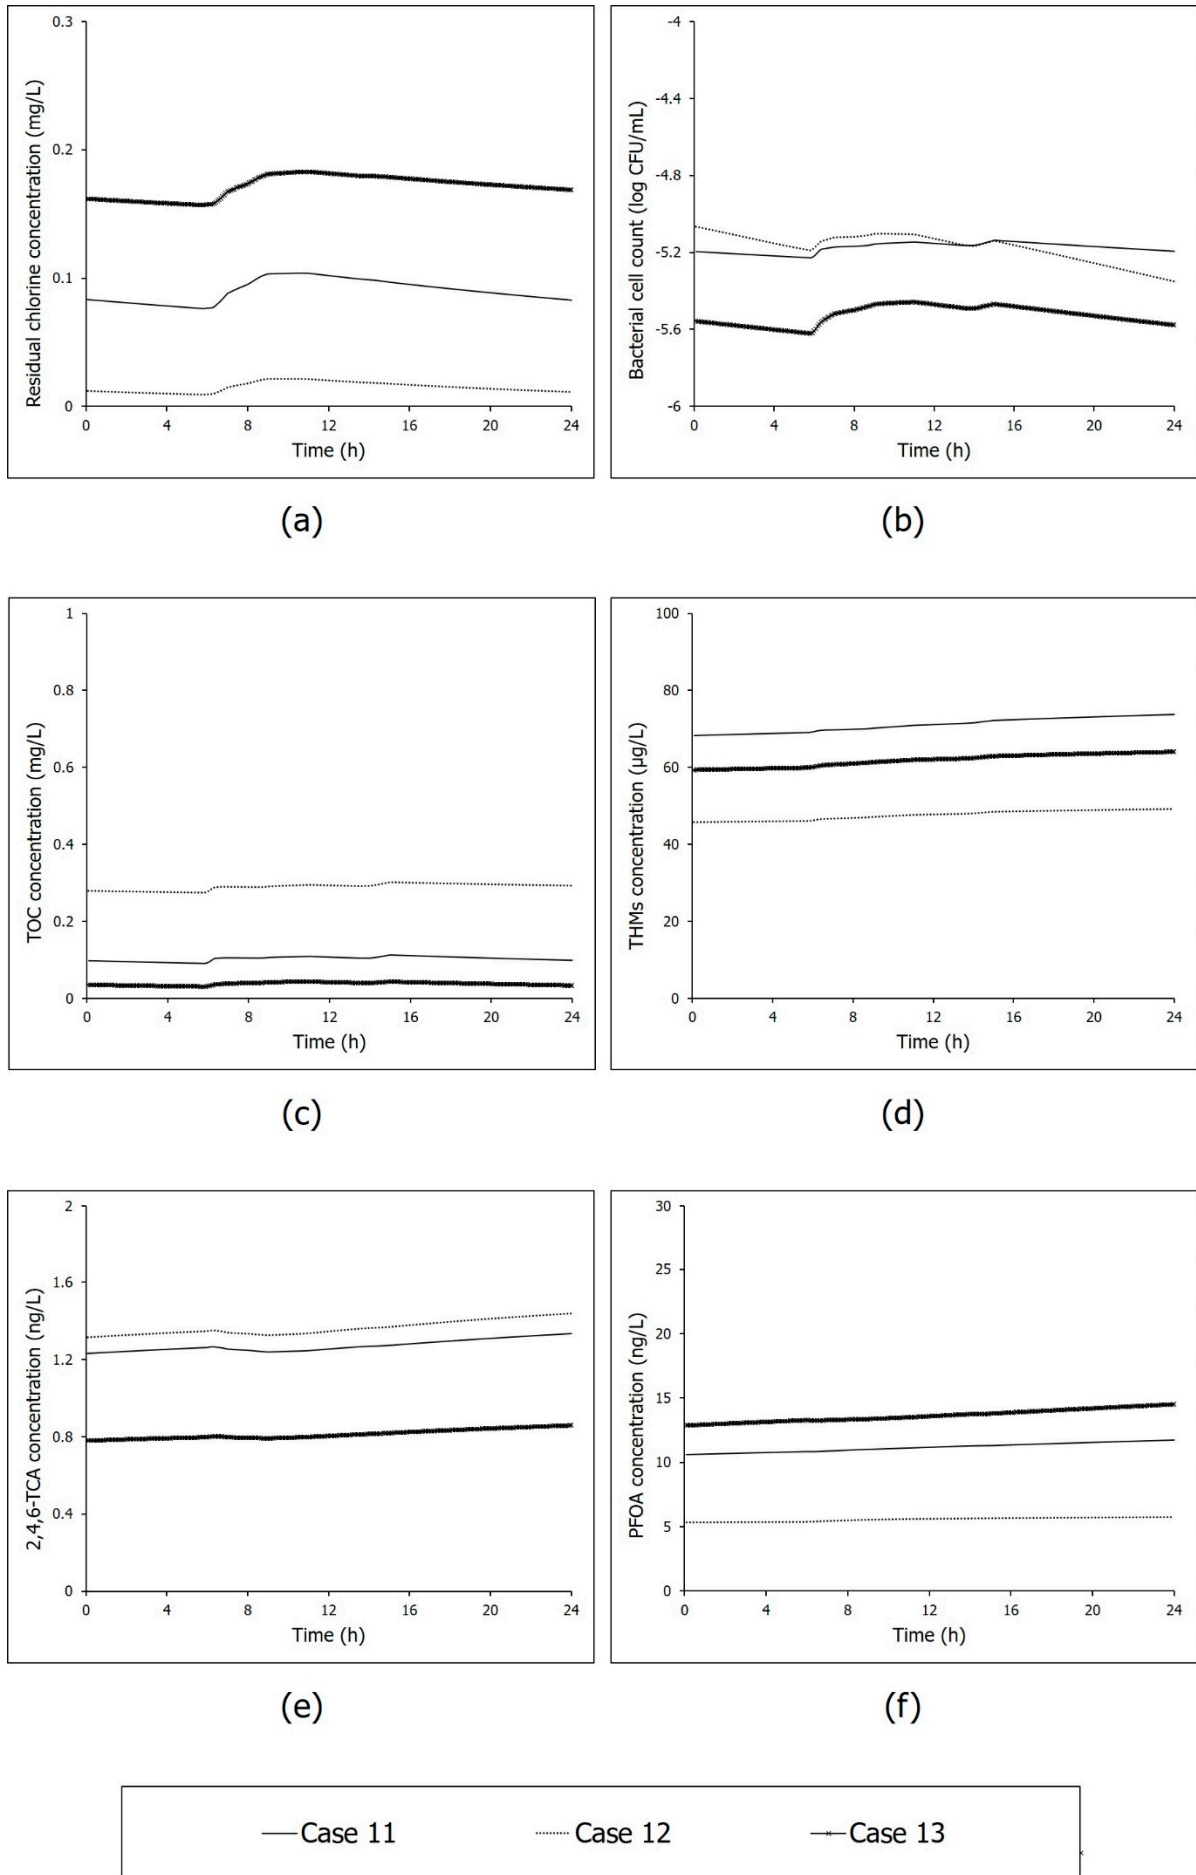

**Figure S9.** 24-h variations in (a) residual chlorine concentration, (b) planktonic bacterial cell count, (c) TOC concentration, (d) THMs concentration, (e) 2,4,6-TCA concentration, and (f) PFOA concentration simulated with EPANET-C Module 1234 under Cases 11, 12, and 13 at network location Tank 2 of Test network 1.

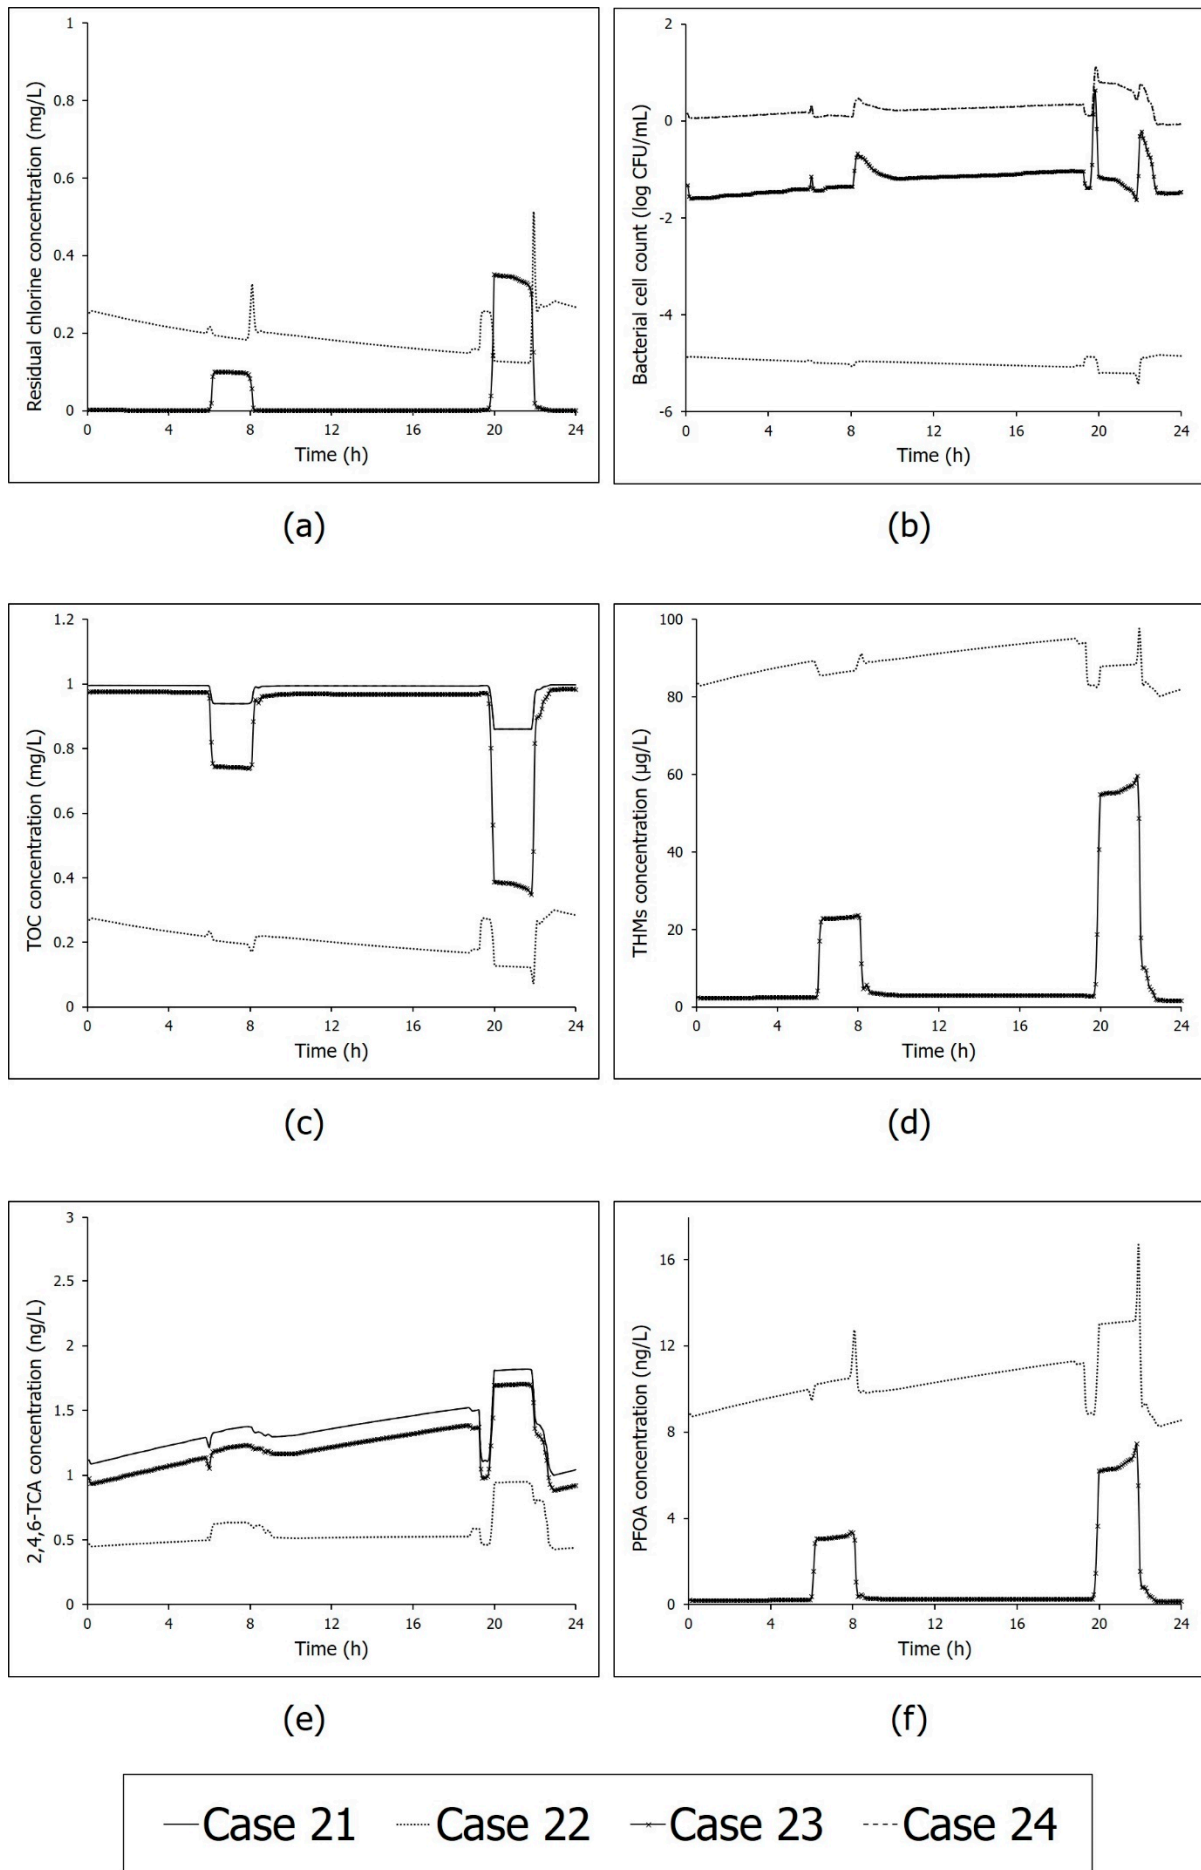

**Figure S10.** 24-h variations in (a) residual chlorine concentration, (b) planktonic bacterial cell count, (c) TOC concentration, (d) THMs concentration, (e) 2,4,6-TCA concentration, and (f) PFOA concentration simulated with EPANET-C Module 1234 under Cases 21, 22, 23, and 24 at network location J45 of Test network 2.

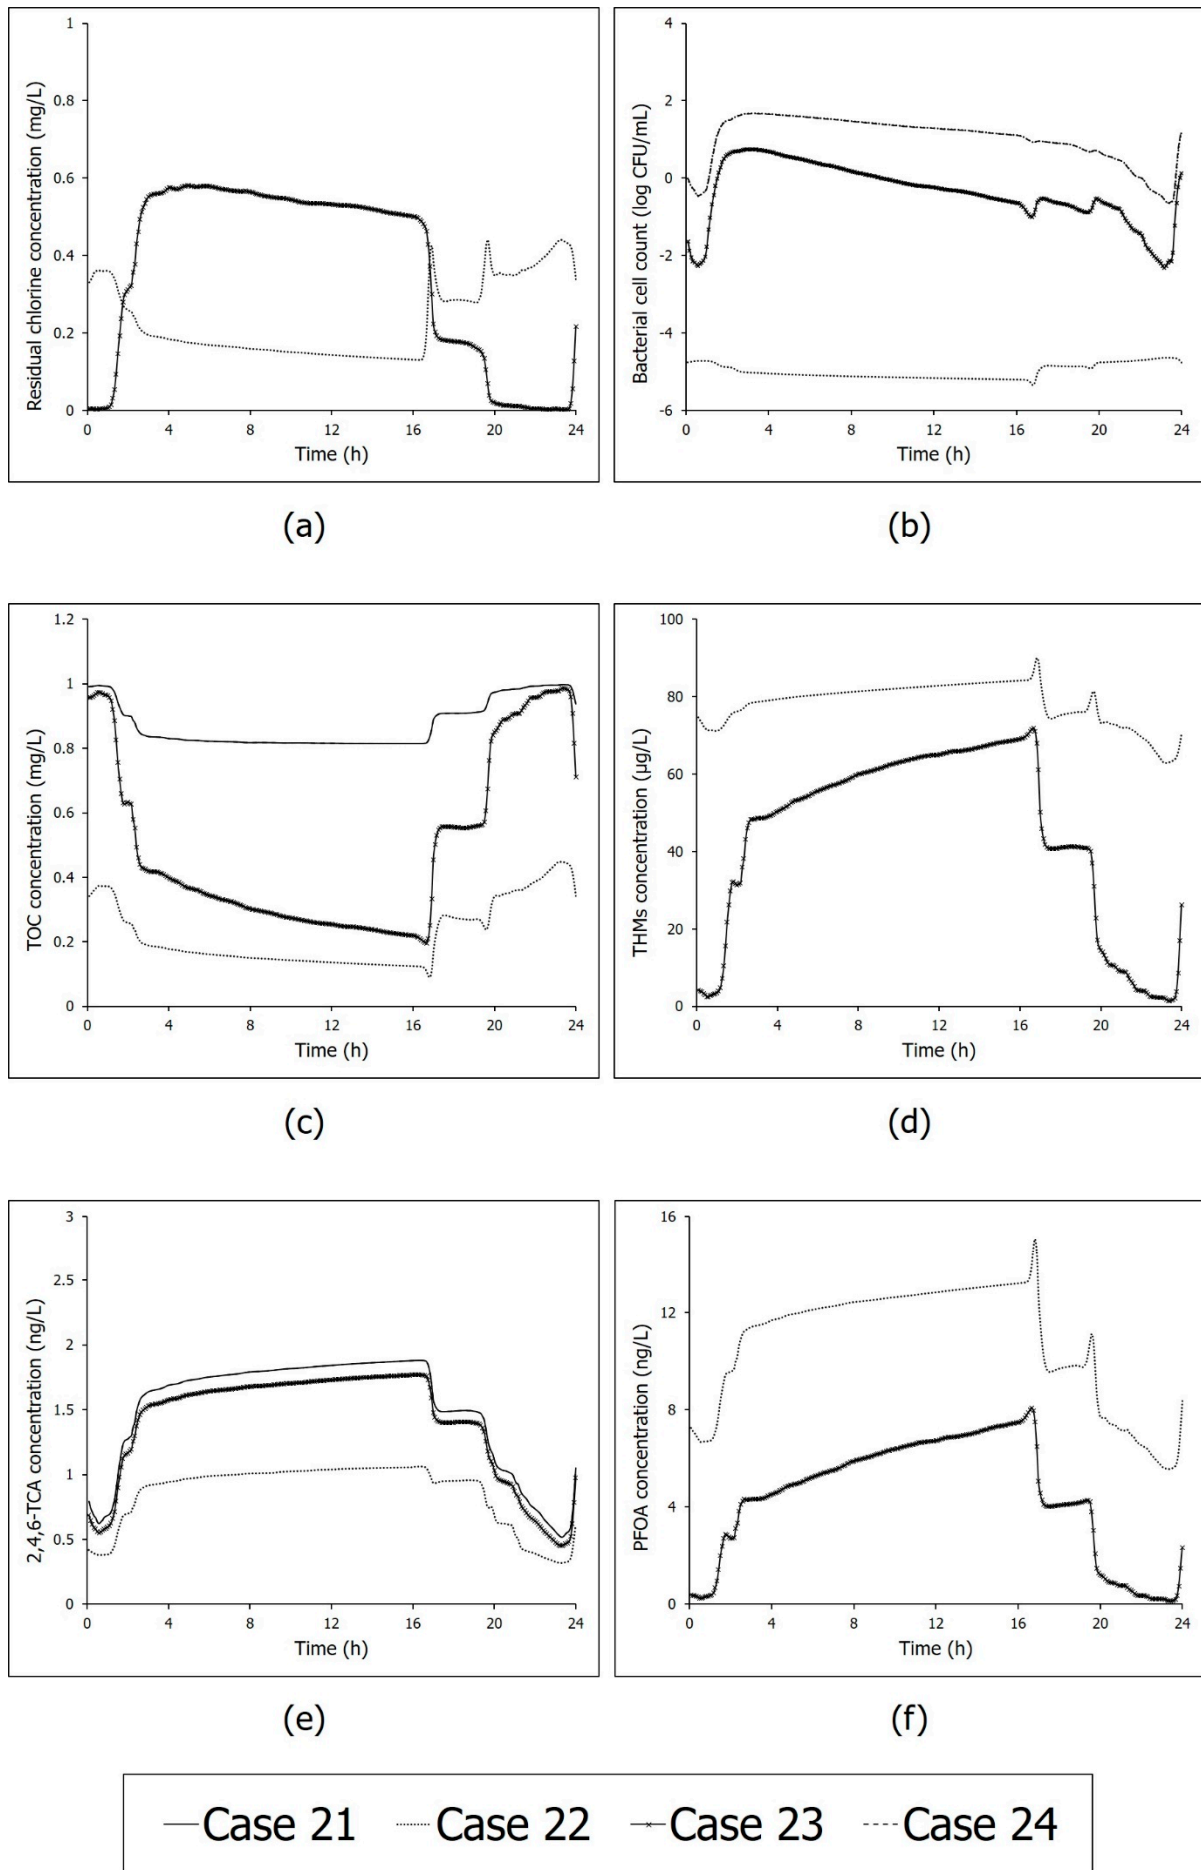

**Figure S11.** 24-h variations in (a) residual chlorine concentration, (b) planktonic bacterial cell count, (c) TOC concentration, (d) THMs concentration, (e) 2,4,6-TCA concentration, and (f) PFOA concentration simulated with EPANET-C Module 1234 under Cases 21, 22, 23, and 24 at network location J4 of Test network 2.

## REFERENCES

1. Kiene, L.; Lu, W.; Levi, Y. Relative importance of the phenomena responsible for chlorine decay in drinking water distribution systems. *Water Sci. Technol.* **1998**, *38*, 219–227.
2. Abokifa, A.A.; Yang, Y.J.; Lo, C.S.; Biswas, P. Investigating the role of biofilms in trihalomethane formation in water distribution systems with a multicomponent model. *Water Res.* **2016**, *104*, 208–219, doi:10.1016/j.watres.2016.08.006.
3. Abhijith, G.R.; Ostfeld, A. Model-based investigation of the formation, transmission, and health risk of perfluorooctanoic acid, a member of PFASs group, in drinking water distribution systems. *Water Res.* **2021**, *204*, 117626, doi:10.1016/j.watres.2021.117626.
4. Abhijith, G.R.; Mohan, S. Random Walk Particle Tracking Embedded Cellular Automata Model for Predicting Temporospacial Variations of Chlorine in Water Distribution Systems. *Environ. Process.* **2020**, *7*, 271–296, doi:10.1007/s40710-019-00406-6.
5. Camper, A.K. *Factors limiting microbial growth in distribution systems: Laboratory and pilot-scale experiments*; AWWA Research Foundation and AWWA: Denver, CO, USA, 1996; ISBN 1583210512.
6. Munavalli, G.R.; MohanKumar, M.S. Dynamic simulation of multicomponent reaction transport in water distribution systems. *Water Res.* **2004**, *38*, 1971–1988, doi:10.1016/j.watres.2004.01.025.
7. Bois, F.Y.; Fahmy, T.; Block, J.C.; Gatel, D. Dynamic modeling of bacteria in a pilot drinking-water distribution system. *Water Res.* **1997**, *31*, 3146–3156, doi:10.1016/S0043-1354(97)00178-4.
8. Billen, G.; Servais, P.; Bouillot, P.; Ventresque, C. Functioning of Biological Filters Used in Drinking-Water Treatment—The Chabrol model. *J. Water Supply Res. Technol.* **1992**, *41*, 231–241.
9. Dukan, S.; Levi, Y.; Piriou, P.; Guyon, F.; Villon, P. Dynamic modelling of bacterial growth in drinking water networks. *Water Res.* **1996**, *30*, 1991–2002.

10. Schrottenbaum, I.; Uber, J.; Ashbolt, N.; Murray, R.; Janke, R.; Szabo, J.; Boccelli, D. Simple Model of Attachment and Detachment of Pathogens in Water Distribution System Biofilms. In Proceedings of the World Environmental and Water Resources Congress 2009: Great Rivers; ASCE, 2009; pp. 145–157.
11. Clark, R.M. Chlorine demand and TTHM formation kinetics: A second-order model. *J. Environ. Eng.* **1998**, *124*, 16–24, doi:10.1061/(ASCE)0733-9372(1998)124:1(16).
12. Clark, R.M.; Sivaganesan, M. Predicting Chlorine Residuals and Formation of TTHMs in Drinking Water. *J. Environ. Eng.* **2002**, *124*, 1203–1210, doi:10.1061/(asce)0733-9372(1998)124:12(1203).
13. Abhijith, G.R.; Ostfeld, A. Modeling the Formation and Propagation of 2,4,6-trichloroanisole, a Dominant Taste and Odor Compound, in Water Distribution Systems. *Water* **2021**, *13*, 638.
